# Supplementary material for: The lipidomes of C. elegans with mutations in asm-3/acid sphingomyelinase and hyl-2/ceramide synthase show distinct lipid profiles during aging
Source: Aging (Albany NY). 2023 Feb 13;15(3):650–74. doi: 10.18632/aging.204515 (PMC9970312; doi:10.18632/aging.204515)
Supplement: Supplementary Table 2 [file aging-15-204515-s003.xlsx]

## Sheet: Supplemental Table 2
Supplemental Table 2. Lipid fold changes between wild type (N2) 10-day and 1-day old animals
lipid	logFC	P.Value	FDR
LPE(20:5)	-5.25249	9.37e-21	1.53e-19
LPE(20:4)	-5.09999	3.67e-28	2.57e-26
LPE(20:3)	-4.84257	2.46e-32	4.32e-30
LPC(18:3)	-4.23172	2.83e-12	1.36e-11
LPC(20:5)	-4.0938	3.1e-25	1.09e-23
LPC(20:4)	-3.46614	6.99e-24	1.75e-22
LPE(18:2)	-3.44294	3.74e-17	3.45e-16
PE(18:0/18:4)	-3.43494	3.99e-13	2.14e-12
LPC(20:3)	-3.40854	1.73e-24	4.85e-23
LPC(18:2)	-3.00673	1.38e-17	1.33e-16
LPE(15:0)	-2.83016	4.95e-16	3.94e-15
PC(14:0/18:3)	-2.65059	1.62e-06	4.13e-06
FFA(20:0)	-2.58638	1.96e-16	1.6e-15
FFA(18:0)	-2.50196	1.64e-20	2.61e-19
LPE(18:1)	-2.42008	1.35e-16	1.17e-15
LPE(20:1)	-2.15755	1.24e-16	1.09e-15
LPE(20:0)	-2.13099	1.7e-15	1.26e-14
PE(14:0/20:4)	-2.04124	4.12e-08	1.31e-07
LPE(16:0)	-2.02463	5.58e-16	4.39e-15
TAG58:6-FA18:0	2.0005	9.2e-15	6.32e-14
PE(O-18:0/14:1)	2.05625	1.16e-07	3.43e-07
TAG56:1-FA18:1	2.0586	3.15e-18	3.2e-17
TAG58:7-FA18:0	2.06273	2.26e-16	1.82e-15
PE(18:2/20:1)	2.07825	2.46e-17	2.3e-16
TAG56:6-FA20:4	2.08954	9.6e-19	1.14e-17
TAG56:6-FA18:1	2.09828	1.43e-18	1.64e-17
PE(O-18:0/20:2)	2.14864	2.53e-18	2.72e-17
PE(18:2/18:2)	2.18049	1.76e-18	1.99e-17
TAG55:1-FA18:1	2.18188	2.51e-19	3.26e-18
TAG56:7-FA20:5	2.18353	1.11e-19	1.56e-18
TAG58:2-FA18:1	2.20041	1.92e-18	2.1e-17
PE(18:1/18:2)	2.20703	3.14e-18	3.2e-17
PE(P-18:1/18:1)	2.21059	5.43e-21	9.07e-20
TAG53:3-FA17:0	2.21148	3.22e-19	4.11e-18
TAG56:8-FA18:1	2.23203	4.96e-20	7.4e-19
TAG58:9-FA18:2	2.23244	5.28e-18	5.29e-17
TAG56:7-FA18:2	2.24584	2.49e-20	3.88e-19
TAG58:3-FA18:1	2.24735	1.92e-18	2.1e-17
PE(P-18:0/20:2)	2.28343	5.91e-20	8.46e-19
PE(P-18:1/18:2)	2.31064	5.08e-19	6.25e-18
FFA(20:2)	2.31626	2.84e-37	1.99e-34
TAG52:3-FA20:2	2.35566	3.08e-18	3.2e-17
TAG56:6-FA22:4	2.38071	1.08e-12	5.46e-12
PC(17:0/20:5)	2.39523	1.85e-17	1.76e-16
TAG58:10-FA20:5	2.39541	1.14e-22	2.67e-21
TAG58:7-FA22:5	2.47233	1.52e-15	1.13e-14
TAG58:8-FA20:4	2.47899	2.28e-22	5e-21
TAG56:6-FA22:5	2.48267	5.78e-12	2.7e-11
TAG52:4-FA20:2	2.50303	1.02e-18	1.19e-17
PC(17:0/18:1)	2.50519	6.54e-25	2.08e-23
PC(17:0/18:2)	2.51959	5.84e-22	1.2e-20
TAG58:5-FA18:1	2.52055	4.09e-21	6.99e-20
TAG56:7-FA18:1	2.52565	1.53e-22	3.45e-21
TAG56:4-FA20:1	2.52622	3.49e-21	6.12e-20
PE(18:0/20:2)	2.52794	1.28e-21	2.5e-20
TAG54:3-FA20:2	2.53212	1.85e-21	3.5e-20
TAG54:4-FA16:1	2.54814	4.51e-19	5.65e-18
TAG50:2-FA20:2	2.54997	2.09e-19	2.82e-18
PC(17:0/20:4)	2.57206	2.92e-18	3.1e-17
PC(17:0/20:3)	2.57256	8.81e-19	1.06e-17
SM(24:1)	2.60044	1.73e-30	2.43e-28
TAG56:6-FA20:2	2.60502	5.5e-20	8.03e-19
DAG(16:1/18:2)	2.60906	0.001273	0.002253
TAG56:3-FA18:0	2.61643	2.96e-22	6.28e-21
PE(15:0/20:2)	2.66719	3.29e-05	7.23e-05
TAG58:9-FA20:4	2.68388	2.92e-25	1.08e-23
TAG58:6-FA18:1	2.69614	5.63e-24	1.52e-22
TAG56:8-FA18:2	2.78794	7.02e-25	2.14e-23
TAG58:6-FA22:4	2.81121	2.19e-14	1.38e-13
PE(17:0/20:2)	2.88217	2.22e-13	1.26e-12
TAG58:8-FA18:1	2.89955	3.58e-26	1.58e-24
TAG56:8-FA20:5	2.92181	6e-27	3.24e-25
TAG58:7-FA18:1	2.93881	1.52e-25	5.92e-24
TAG58:10-FA20:4	2.95634	8.23e-28	5.25e-26
TAG56:7-FA20:4	2.96014	1.55e-27	9.05e-26
TAG56:5-FA18:2	2.97661	9.03e-25	2.64e-23
TAG58:7-FA18:2	3.01511	2.83e-21	5.08e-20
PE(P-18:1/20:2)	3.0863	6.4e-25	2.08e-23
TAG56:4-FA18:1	3.0901	3.6e-26	1.58e-24
TAG52:2-FA20:2	3.11477	5.46e-26	2.25e-24
TAG56:4-FA20:2	3.11884	2.43e-26	1.21e-24
PC(12:0/20:2)	3.18129	0.000257	0.000501
PC(18:1/20:2)	3.22557	5.86e-24	1.52e-22
TAG54:2-FA20:2	3.38002	2.11e-28	1.64e-26
TAG58:8-FA18:2	3.38789	2.01e-21	3.7e-20
TAG56:3-FA20:2	3.39363	6.98e-29	6.12e-27
PE(18:1/20:2)	3.41495	7.41e-30	8.66e-28
PE(P-18:1/16:1)	3.57332	7.43e-23	1.8e-21
TAG56:5-FA20:2	3.58405	1.48e-29	1.48e-27
PC(18:2/20:2)	3.60364	2.11e-06	5.26e-06
PE(P-18:1/20:1)	3.60391	7.46e-22	1.49e-20
TAG58:7-FA20:4	3.6509	1.46e-32	3.42e-30
PE(18:2/20:2)	3.75197	1.82e-19	2.51e-18
DAG(18:1/20:2)	4.40126	3.54e-05	7.74e-05
