# Supplementary material for: The lipidomes of C. elegans with mutations in asm-3/acid sphingomyelinase and hyl-2/ceramide synthase show distinct lipid profiles during aging
Source: Aging (Albany NY). 2023 Feb 13;15(3):650–74. doi: 10.18632/aging.204515 (PMC9970312; doi:10.18632/aging.204515)
Supplement: Supplementary Table 3 [file aging-15-204515-s004.xlsx]

## Sheet: Supplemental Table 3
Supplemental Table 3. Lipid fold changes between 10-day N2 and 10-day asm-3 animals
lipid	logFC	P.Value	FDR
TAG44:2-FA12:0	-5.26268	5.51e-19	1.29e-18
PC(18:2/18:3)	-5.24134	1.55e-13	2.34e-13
PC(12:0/20:2)	-5.1316	2.9e-08	3.63e-08
TAG46:3-FA14:0	-5.11585	1.58e-23	6.88e-23
TAG42:0-FA14:0	-4.886	8.19e-10	1.07e-09
TAG42:1-FA14:0	-4.71394	2.83e-14	4.51e-14
TAG48:4-FA14:1	-4.69618	1.62e-33	3.78e-31
TAG44:1-FA14:1	-4.63283	3.96e-20	1.04e-19
PC(12:0/16:1)	-4.52937	2.53e-11	3.5e-11
PC(12:0/20:1)	-4.51319	1.73e-09	2.22e-09
TAG44:0-FA12:0	-4.46533	4.84e-17	9.47e-17
TAG46:3-FA14:1	-4.4194	1.89e-36	1.32e-33
PC(16:0/18:3)	-4.36621	1.74e-16	3.27e-16
PC(14:0/18:3)	-4.23104	2.91e-12	4.13e-12
TAG48:4-FA16:1	-4.18317	2.2e-20	6.02e-20
TAG44:1-FA16:1	-4.17679	1.22e-25	8.84e-25
TAG44:2-FA14:0	-4.1553	1.47e-13	2.23e-13
TAG44:0-FA16:0	-4.09214	2.92e-13	4.35e-13
TAG50:2-FA20:2	-4.08721	6.54e-32	5.73e-30
LPC(16:1)	-4.07583	4.87e-14	7.57e-14
TAG45:0-FA15:0	-4.00406	5.33e-35	1.87e-32
LPC(18:3)	-4.00191	2.06e-11	2.86e-11
TAG52:2-FA20:2	-3.98694	4.69e-33	8.22e-31
TAG50:4-FA14:1	-3.97261	1.34e-30	5.88e-29
TAG46:1-FA14:1	-3.94268	1.42e-31	9.93e-30
TAG44:0-FA14:0	-3.89893	3.06e-27	3.49e-26
TAG44:1-FA14:0	-3.882	4.42e-24	2.15e-23
TAG46:2-FA18:2	-3.87544	2.1e-20	5.78e-20
TAG46:0-FA12:0	-3.87521	4.89e-11	6.64e-11
LCER(18:0)	-3.87383	1.02e-09	1.33e-09
TAG46:2-FA14:0	-3.86575	3.09e-27	3.49e-26
PC(12:0/18:3)	-3.84902	5.4e-15	9.06e-15
TAG48:4-FA18:3	-3.80802	8.64e-18	1.81e-17
TAG50:4-FA18:2	-3.8002	5.77e-30	1.94e-28
TAG46:1-FA16:1	-3.78788	7.82e-29	1.89e-27
TAG46:2-FA14:1	-3.77764	3.77e-31	2.4e-29
TAG54:2-FA20:2	-3.77655	1.31e-31	9.93e-30
TAG49:3-FA18:2	-3.76968	1.34e-30	5.88e-29
TAG48:1-FA14:1	-3.76731	4.89e-32	4.89e-30
TAG52:3-FA20:2	-3.75385	3.27e-30	1.35e-28
TAG48:3-FA18:2	-3.75235	3.7e-28	6.33e-27
TAG44:1-FA12:0	-3.75077	2.27e-24	1.18e-23
TAG46:2-FA16:1	-3.74259	7.88e-26	6.01e-25
TAG47:0-FA17:0	-3.74202	4.12e-32	4.81e-30
TAG52:4-FA20:2	-3.74004	5.52e-29	1.49e-27
TAG46:3-FA16:1	-3.73573	9.86e-31	4.94e-29
TAG47:0-FA15:0	-3.73562	1.44e-32	2.03e-30
PE(14:0/18:2)	-3.72749	4.07e-22	1.38e-21
TAG44:1-FA18:1	-3.71792	7.62e-24	3.51e-23
TAG45:1-FA15:0	-3.71547	5.82e-30	1.94e-28
TAG48:2-FA18:2	-3.69563	7.37e-30	2.35e-28
TAG44:2-FA16:1	-3.6731	8.7e-26	6.49e-25
TAG50:4-FA16:1	-3.65404	1.08e-26	1.04e-25
TAG47:2-FA18:2	-3.65251	2.91e-29	8.51e-28
TAG52:3-FA14:0	-3.64997	8.15e-28	1.22e-26
TAG47:2-FA16:1	-3.6412	1.06e-28	2.39e-27
TAG46:1-FA14:0	-3.62823	3.67e-25	2.38e-24
PE(15:0/20:2)	-3.62456	6.28e-08	7.73e-08
PC(15:0/16:1)	-3.61696	9.43e-14	1.44e-13
TAG46:3-FA18:2	-3.61291	2.52e-26	2.15e-25
TAG48:3-FA14:0	-3.60846	6.37e-26	4.96e-25
PC(14:0/16:1)	-3.59803	7.09e-13	1.03e-12
TAG48:1-FA16:1	-3.57194	1.15e-28	2.51e-27
TAG46:0-FA14:0	-3.57096	6.19e-26	4.88e-25
TAG47:2-FA14:0	-3.55315	1.79e-27	2.28e-26
TAG47:1-FA16:1	-3.54352	8.37e-28	1.22e-26
TAG46:1-FA18:1	-3.5402	7.87e-25	4.48e-24
TAG51:4-FA18:2	-3.51018	5.23e-30	1.93e-28
TAG54:4-FA16:1	-3.50677	4.04e-27	4.23e-26
TAG50:2-FA18:2	-3.49858	1.05e-29	3.2e-28
TAG47:1-FA15:0	-3.49464	3.86e-30	1.5e-28
TAG48:3-FA16:1	-3.49368	2.84e-27	3.43e-26
TAG45:0-FA14:0	-3.46605	1.67e-23	7.22e-23
TAG49:0-FA17:0	-3.4608	4.29e-31	2.51e-29
TAG50:5-FA18:2	-3.4607	3.57e-16	6.53e-16
TAG48:4-FA14:0	-3.44977	4.1e-23	1.67e-22
TAG48:4-FA18:2	-3.44722	2.31e-28	4.34e-27
TAG50:1-FA20:1	-3.43824	4.39e-28	7.33e-27
TAG50:5-FA18:3	-3.43596	1.25e-26	1.17e-25
PC(18:2/20:2)	-3.41826	5.9e-06	6.94e-06
TAG49:2-FA18:2	-3.41757	1.95e-28	3.81e-27
TAG47:1-FA17:0	-3.41704	2.51e-27	3.09e-26
PE(P-18:1/18:3)	-3.40228	1.14e-12	1.64e-12
TAG56:5-FA20:2	-3.40025	4.61e-28	7.52e-27
TAG50:3-FA14:1	-3.39828	1.82e-28	3.64e-27
TAG49:0-FA15:0	-3.39284	6.16e-31	3.32e-29
TAG51:4-FA16:1	-3.38999	5.78e-28	8.81e-27
TAG48:2-FA14:1	-3.36589	8.58e-29	2e-27
TAG48:0-FA14:0	-3.34805	5.74e-26	4.57e-25
TAG54:3-FA20:2	-3.347	7.75e-29	1.89e-27
TAG47:2-FA18:1	-3.34663	5.6e-28	8.73e-27
TAG50:3-FA18:2	-3.34432	1.66e-27	2.15e-26
TAG42:1-FA18:1	-3.33835	8.43e-23	3.25e-22
TAG48:2-FA16:1	-3.30982	3.97e-25	2.55e-24
TAG47:2-FA15:0	-3.30272	2.41e-28	4.34e-27
TAG48:3-FA18:3	-3.28441	1.28e-19	3.2e-19
TAG56:5-FA18:2	-3.28412	1.97e-27	2.47e-26
TAG47:1-FA14:0	-3.26681	2.48e-25	1.69e-24
TAG49:3-FA15:0	-3.26232	2.41e-28	4.34e-27
TAG49:2-FA16:1	-3.26133	3.1e-27	3.49e-26
TAG52:2-FA18:2	-3.2581	6.49e-29	1.69e-27
TAG46:1-FA16:0	-3.25438	8.79e-23	3.37e-22
TAG50:5-FA16:1	-3.24856	9.81e-17	1.88e-16
TAG49:1-FA17:0	-3.23564	4.26e-29	1.19e-27
TAG52:1-FA20:1	-3.23125	3.11e-28	5.45e-27
TAG50:2-FA14:1	-3.2231	1.26e-27	1.74e-26
TAG51:5-FA18:2	-3.21842	3.51e-27	3.79e-26
TAG52:4-FA16:1	-3.21828	4.17e-25	2.63e-24
TAG49:2-FA17:0	-3.20063	1.63e-27	2.15e-26
TAG56:3-FA20:2	-3.19849	3.19e-27	3.5e-26
TAG51:5-FA18:3	-3.19741	5.3e-28	8.45e-27
TAG45:1-FA16:0	-3.19593	1.5e-26	1.35e-25
TAG49:3-FA16:1	-3.1953	5.72e-26	4.57e-25
TAG47:1-FA16:0	-3.19155	2e-26	1.73e-25
TAG50:1-FA16:1	-3.19008	1.04e-26	1.02e-25
TAG44:3-FA18:2	-3.1837	1.67e-10	2.24e-10
PE(O-18:0/14:1)	-3.17636	7.29e-14	1.12e-13
TAG48:2-FA16:0	-3.17436	8.93e-25	5.01e-24
TAG48:2-FA18:1	-3.17208	2.67e-23	1.12e-22
TAG50:3-FA18:3	-3.15863	3.72e-27	3.95e-26
TAG50:4-FA14:0	-3.1555	4.31e-23	1.74e-22
TAG47:0-FA14:0	-3.15347	6.31e-25	3.72e-24
TAG49:3-FA18:3	-3.15328	1.02e-24	5.57e-24
TAG48:0-FA18:0	-3.14738	8.71e-25	4.92e-24
TAG49:1-FA16:1	-3.14366	1.53e-26	1.36e-25
TAG51:0-FA17:0	-3.14351	1.78e-28	3.64e-27
LPC(15:0)	-3.1312	4.26e-17	8.36e-17
TAG46:0-FA16:0	-3.13065	1.75e-25	1.2e-24
TAG44:2-FA18:1	-3.12766	2.81e-20	7.49e-20
LPC(20:0)	-3.12701	3.62e-05	4.17e-05
TAG50:4-FA18:3	-3.12339	9.7e-25	5.4e-24
TAG50:3-FA14:0	-3.12276	6.9e-23	2.69e-22
TAG51:2-FA18:2	-3.1226	8.51e-28	1.22e-26
TAG52:5-FA16:1	-3.12081	4.43e-25	2.77e-24
TAG56:6-FA20:2	-3.1198	1.88e-24	9.91e-24
TAG51:3-FA18:2	-3.10914	1.15e-27	1.61e-26
TAG47:1-FA18:1	-3.10886	7.12e-25	4.12e-24
TAG48:1-FA14:0	-3.10345	1.33e-23	5.88e-23
TAG48:3-FA16:0	-3.10134	3.64e-19	8.7e-19
TAG56:4-FA20:2	-3.09326	4.06e-26	3.31e-25
TAG49:1-FA15:0	-3.0927	1.32e-28	2.81e-27
TAG48:1-FA18:1	-3.07787	2.65e-25	1.77e-24
TAG53:3-FA17:0	-3.07132	1.5e-27	2.02e-26
PE(O-18:0/20:2)	-3.06998	3.13e-27	3.49e-26
TAG54:5-FA20:2	-3.06681	9.79e-25	5.4e-24
TAG51:4-FA15:0	-3.06597	1.14e-26	1.08e-25
TAG50:4-FA18:1	-3.05265	6.1e-25	3.68e-24
TAG50:3-FA20:3	-3.05058	1.37e-26	1.25e-25
TAG51:3-FA15:0	-3.04845	7.56e-27	7.58e-26
TAG46:2-FA18:1	-3.0479	2.01e-22	7.26e-22
TAG46:0-FA18:0	-3.04562	5.25e-11	7.12e-11
TAG52:4-FA14:0	-3.04395	4.3e-23	1.74e-22
TAG52:5-FA18:2	-3.03957	3.46e-24	1.73e-23
TAG54:4-FA20:2	-3.02754	1.03e-25	7.6e-25
TAG54:5-FA18:2	-3.01452	4.72e-25	2.93e-24
TAG45:0-FA16:0	-3.01397	5.8e-23	2.27e-22
TAG49:1-FA14:0	-3.00917	5.15e-24	2.45e-23
TAG48:1-FA18:0	-3.00875	6.19e-22	2.04e-21
TAG49:2-FA18:1	-3.00829	1.39e-25	9.85e-25
PE(O-18:0/18:2)	-3.00637	6.61e-27	6.82e-26
TAG52:8-FA18:2	-3.00359	2.68e-25	1.77e-24
TAG53:2-FA18:2	-3.003	2.89e-27	3.43e-26
TAG49:2-FA16:0	-3.00125	3.35e-26	2.8e-25
TAG46:1-FA12:0	-2.996	7.04e-22	2.27e-21
DAG(15:0/18:2)	-2.98162	0.00135	0.001485
TAG53:4-FA17:0	-2.97945	1.33e-26	1.22e-25
TAG45:1-FA18:1	-2.97358	4.07e-22	1.38e-21
TAG52:3-FA20:3	-2.97262	1.32e-25	9.43e-25
TAG52:8-FA16:1	-2.96555	8.39e-26	6.32e-25
TAG50:3-FA18:0	-2.96368	4.71e-22	1.57e-21
TAG50:3-FA18:1	-2.9613	4.69e-24	2.27e-23
TAG52:0-FA20:0	-2.96048	6.74e-24	3.13e-23
TAG49:2-FA14:0	-2.95477	8.42e-24	3.86e-23
TAG53:3-FA18:2	-2.95316	1.05e-26	1.02e-25
PC(15:0/20:5)	-2.9505	2e-22	7.26e-22
TAG48:3-FA12:0	-2.94861	6.6e-20	1.69e-19
TAG52:6-FA18:3	-2.94442	2.62e-22	9.29e-22
TAG54:3-FA16:0	-2.94208	6.2e-25	3.72e-24
TAG51:3-FA17:0	-2.93941	2.88e-26	2.43e-25
TAG51:2-FA16:1	-2.9329	5.6e-25	3.44e-24
TAG50:0-FA18:0	-2.93054	3.89e-26	3.21e-25
TAG48:2-FA14:0	-2.93022	6.56e-22	2.13e-21
PC(17:0/16:1)	-2.92965	1.2e-21	3.71e-21
TAG52:3-FA18:3	-2.92739	1.32e-24	7.07e-24
LPC(20:2)	-2.92737	1e-20	2.84e-20
PC(17:0/20:5)	-2.92458	4.61e-22	1.55e-21
TAG52:4-FA18:2	-2.92341	7.27e-25	4.18e-24
TAG52:2-FA14:0	-2.9188	6.37e-22	2.09e-21
TAG51:4-FA18:3	-2.90562	7.1e-27	7.21e-26
TAG50:2-FA16:1	-2.90554	1.26e-23	5.66e-23
DAG(16:1/18:2)	-2.90238	0.000376	0.000422
TAG56:3-FA18:0	-2.90206	6.51e-25	3.8e-24
PC(15:0/18:2)	-2.899	6.77e-26	5.22e-25
TAG47:0-FA16:0	-2.88833	5.17e-24	2.45e-23
TAG50:2-FA18:0	-2.88683	4.39e-23	1.75e-22
TAG44:1-FA16:0	-2.8847	3.46e-16	6.37e-16
TAG55:5-FA18:2	-2.87531	1.7e-25	1.18e-24
TAG56:6-FA18:3	-2.87515	2.52e-25	1.7e-24
TAG52:3-FA18:2	-2.87477	1.59e-25	1.11e-24
TAG48:1-FA16:0	-2.87024	3.64e-23	1.5e-22
TAG56:4-FA18:1	-2.8696	3.34e-24	1.68e-23
TAG46:2-FA16:0	-2.86689	1.32e-21	4.02e-21
TAG52:6-FA18:2	-2.86003	3.97e-22	1.36e-21
PE(O-16:0/20:2)	-2.85367	9.89e-14	1.5e-13
PE(16:0/20:2)	-2.8506	1.75e-23	7.5e-23
TAG50:1-FA18:1	-2.84422	3.28e-25	2.15e-24
TAG48:3-FA14:1	-2.83271	1.74e-24	9.22e-24
TAG49:3-FA16:0	-2.82592	1.19e-23	5.36e-23
TAG51:1-FA17:0	-2.82434	1.6e-26	1.41e-25
TAG51:3-FA18:3	-2.81928	5.73e-25	3.49e-24
TAG49:0-FA18:0	-2.81879	2.03e-24	1.06e-23
TAG54:6-FA18:2	-2.81253	1.48e-23	6.54e-23
TAG48:3-FA18:1	-2.80692	4.83e-23	1.91e-22
PE(16:0/18:3)	-2.80473	2.83e-05	3.27e-05
PC(17:0/18:2)	-2.79769	1.26e-24	6.78e-24
TAG48:0-FA16:0	-2.79613	2.95e-24	1.5e-23
TAG46:2-FA12:0	-2.78482	2.68e-19	6.5e-19
TAG54:5-FA16:1	-2.77776	2.12e-22	7.62e-22
TAG51:1-FA15:0	-2.77489	1.04e-25	7.63e-25
TAG58:5-FA18:1	-2.77404	1.7e-23	7.29e-23
TAG54:7-FA22:6	-2.77354	1.49e-08	1.88e-08
TAG52:2-FA20:1	-2.76276	1.91e-22	6.97e-22
TAG51:3-FA16:1	-2.76129	9.69e-23	3.67e-22
TAG52:3-FA20:1	-2.75968	3.33e-22	1.14e-21
LPC(18:2)	-2.75534	8.66e-16	1.55e-15
TAG50:3-FA16:0	-2.74882	1.2e-21	3.71e-21
DAG(18:1/20:2)	-2.73912	0.007733	0.008327
PE(O-18:0/18:3)	-2.7375	0.011156	0.011939
TAG54:2-FA18:2	-2.73141	5.73e-23	2.26e-22
TAG51:2-FA15:0	-2.7301	1.14e-24	6.2e-24
TAG56:4-FA18:2	-2.72486	1.57e-23	6.87e-23
TAG50:2-FA14:0	-2.72199	3.22e-20	8.55e-20
TAG54:4-FA20:1	-2.72087	2.46e-22	8.76e-22
TAG48:2-FA12:0	-2.72069	6.18e-19	1.44e-18
TAG50:2-FA18:1	-2.7126	3.06e-22	1.07e-21
TAG50:1-FA18:0	-2.70775	3.11e-22	1.08e-21
TAG54:3-FA16:1	-2.70094	5.2e-22	1.72e-21
TAG49:2-FA15:0	-2.69914	4.29e-24	2.11e-23
TAG53:4-FA18:3	-2.69776	6.41e-24	3.01e-23
TAG54:1-FA20:1	-2.6974	4.34e-23	1.74e-22
TAG56:5-FA20:1	-2.69469	1.22e-21	3.74e-21
TAG52:2-FA16:1	-2.68949	9.78e-22	3.06e-21
TAG50:0-FA14:0	-2.68534	1.12e-19	2.8e-19
TAG53:4-FA18:2	-2.67894	2.47e-24	1.27e-23
TAG52:3-FA16:1	-2.67661	4.85e-21	1.41e-20
TAG50:1-FA14:0	-2.67277	3.29e-20	8.69e-20
TAG49:1-FA18:1	-2.671	9.09e-23	3.46e-22
TAG50:4-FA20:3	-2.6675	2.54e-11	3.51e-11
LPC(16:0)	-2.66708	9.49e-19	2.18e-18
TAG54:3-FA18:2	-2.65391	2.16e-23	9.13e-23
TAG54:8-FA18:2	-2.64997	7.87e-22	2.49e-21
PE(16:0/14:0)	-2.64647	8.82e-16	1.57e-15
TAG53:2-FA17:0	-2.64595	4.3e-24	2.11e-23
TAG54:3-FA20:3	-2.64303	2.04e-23	8.66e-23
TAG52:4-FA18:3	-2.63949	1.3e-23	5.79e-23
PE(14:0/16:1)	-2.63768	2.49e-09	3.19e-09
TAG56:4-FA20:1	-2.63759	3.07e-22	1.07e-21
TAG53:1-FA17:0	-2.63694	2.89e-24	1.48e-23
LPC(17:0)	-2.63317	3.38e-19	8.11e-19
TAG52:1-FA20:0	-2.62938	6.64e-21	1.91e-20
PC(18:1/20:2)	-2.62799	5.47e-19	1.29e-18
PE(16:0/16:1)	-2.61843	6.31e-17	1.22e-16
TAG49:1-FA16:0	-2.61469	6.5e-24	3.04e-23
TAG52:1-FA16:1	-2.60949	2.66e-21	7.83e-21
PE(16:0/18:2)	-2.60701	1.45e-21	4.39e-21
TAG54:6-FA18:3	-2.60361	1.16e-21	3.62e-21
TAG55:2-FA18:2	-2.60098	2.81e-22	9.91e-22
TAG51:1-FA18:0	-2.59612	9.17e-24	4.17e-23
TAG52:5-FA18:3	-2.58913	3.19e-22	1.1e-21
TAG51:2-FA18:1	-2.57748	3.7e-23	1.52e-22
TAG55:3-FA18:2	-2.57508	8.33e-23	3.22e-22
TAG56:3-FA18:2	-2.56948	2.18e-21	6.49e-21
TAG52:4-FA20:3	-2.55922	2.07e-21	6.2e-21
TAG54:4-FA18:2	-2.55759	7.04e-22	2.27e-21
LCER(18:1)	-2.55348	9.19e-12	1.28e-11
PC(17:0/20:4)	-2.55224	4.31e-18	9.32e-18
TAG52:1-FA18:1	-2.55201	2.76e-23	1.15e-22
TAG52:3-FA18:0	-2.54659	1.01e-20	2.86e-20
PE(O-18:0/16:1)	-2.5446	4.04e-25	2.57e-24
TAG52:4-FA18:1	-2.53906	2.35e-20	6.37e-20
TAG56:10-FA18:2	-2.53906	8.47e-22	2.68e-21
TAG53:3-FA16:0	-2.53379	1.47e-22	5.54e-22
PE(17:0/20:2)	-2.53092	2.8e-11	3.86e-11
PC(15:0/18:1)	-2.52947	6.26e-25	3.72e-24
TAG52:5-FA14:0	-2.52893	4.52e-19	1.08e-18
PC(17:0/20:3)	-2.52285	2.39e-18	5.34e-18
TAG56:6-FA22:5	-2.52279	3.18e-12	4.51e-12
PC(15:0/20:4)	-2.52204	2.65e-17	5.25e-17
TAG54:3-FA18:0	-2.52113	1.39e-21	4.23e-21
TAG48:2-FA18:0	-2.52056	1.85e-18	4.17e-18
TAG54:6-FA22:5	-2.51752	5.15e-14	7.98e-14
TAG50:3-FA16:1	-2.51704	9.98e-20	2.52e-19
TAG51:0-FA18:0	-2.51435	2.7e-23	1.13e-22
TAG46:1-FA18:0	-2.51328	8.45e-14	1.29e-13
PE(18:1/20:2)	-2.50846	1.31e-21	4.01e-21
TAG49:0-FA16:0	-2.50449	1.84e-22	6.76e-22
TAG58:8-FA18:2	-2.49641	8.4e-15	1.4e-14
TAG52:6-FA16:1	-2.49396	3.82e-21	1.12e-20
DAG(16:1/16:1)	-2.49251	7.73e-05	8.84e-05
TAG56:3-FA20:0	-2.48029	2.1e-20	5.78e-20
TAG51:2-FA17:0	-2.47024	4.39e-22	1.48e-21
TAG58:7-FA18:2	-2.46529	9.56e-17	1.84e-16
TAG52:4-FA16:0	-2.46306	2.31e-20	6.29e-20
TAG55:4-FA18:2	-2.46254	9.05e-22	2.84e-21
TAG54:4-FA18:3	-2.46174	7.7e-22	2.47e-21
TAG56:7-FA16:1	-2.45891	2.1e-14	3.37e-14
DAG(16:0/18:2)	-2.45857	0.002534	0.002776
TAG52:0-FA18:0	-2.45711	2.19e-22	7.84e-22
TAG51:1-FA18:1	-2.45565	1.51e-22	5.64e-22
PE(P-18:1/20:2)	-2.45047	3.09e-19	7.45e-19
TAG53:1-FA18:0	-2.44979	1.72e-22	6.34e-22
TAG54:5-FA18:1	-2.44263	7.84e-21	2.24e-20
TAG54:3-FA18:3	-2.44173	1.29e-19	3.21e-19
TAG54:4-FA18:1	-2.43854	3.44e-20	9.06e-20
TAG54:4-FA18:0	-2.43814	2.23e-21	6.61e-21
TAG54:2-FA20:1	-2.43811	1.01e-20	2.86e-20
TAG58:7-FA22:5	-2.43789	2.86e-15	4.88e-15
TAG52:3-FA16:0	-2.43766	1.67e-20	4.67e-20
TAG53:1-FA18:1	-2.43593	1.72e-22	6.34e-22
TAG53:2-FA18:1	-2.43382	4.84e-22	1.61e-21
TAG52:2-FA20:0	-2.43345	5.43e-18	1.16e-17
TAG55:4-FA18:1	-2.42667	6.45e-22	2.1e-21
TAG50:0-FA16:0	-2.42533	7.85e-22	2.49e-21
PC(17:0/18:1)	-2.42303	4.88e-24	2.34e-23
TAG56:7-FA22:5	-2.42283	1.8e-17	3.66e-17
TAG55:7-FA15:0	-2.41481	8.7e-20	2.21e-19
TAG54:4-FA16:0	-2.40872	2.01e-21	6.04e-21
TAG54:7-FA18:3	-2.40531	2.45e-19	5.99e-19
TAG56:6-FA18:2	-2.405	5.13e-21	1.49e-20
TAG50:5-FA14:0	-2.40408	1e-15	1.77e-15
TAG52:5-FA20:3	-2.40388	4.93e-19	1.16e-18
TAG50:5-FA20:5	-2.38538	6.51e-20	1.68e-19
PE(O-18:0/18:1)	-2.38466	3.68e-24	1.83e-23
TAG50:2-FA16:0	-2.38382	5.75e-20	1.49e-19
TAG50:4-FA16:0	-2.37562	2.03e-17	4.12e-17
PC(15:0/18:3)	-2.37269	4.13e-18	8.95e-18
PE(17:0/22:5)	-2.36703	1.25e-14	2.05e-14
TAG52:7-FA18:1	-2.36685	2.61e-21	7.71e-21
TAG48:1-FA12:0	-2.36596	8.13e-16	1.46e-15
TAG52:7-FA16:0	-2.36097	2.02e-20	5.58e-20
TAG58:9-FA18:2	-2.35989	3.06e-19	7.41e-19
TAG51:1-FA16:0	-2.35934	3.1e-21	9.1e-21
TAG56:6-FA20:3	-2.35244	9.13e-21	2.6e-20
LPE(20:2)	-2.34724	1.24e-16	2.35e-16
TAG50:1-FA16:0	-2.34693	6.31e-21	1.82e-20
TAG56:8-FA22:6	-2.34555	6.71e-13	9.76e-13
PC(12:0/20:5)	-2.34409	2.05e-09	2.63e-09
TAG58:6-FA18:1	-2.33668	1.98e-20	5.5e-20
TAG56:6-FA16:0	-2.33345	6.52e-14	1.01e-13
TAG51:0-FA16:0	-2.33305	1.69e-20	4.71e-20
TAG52:5-FA18:1	-2.32972	9.56e-20	2.42e-19
PE(16:0/18:1)	-2.32444	1.71e-22	6.34e-22
PE(P-18:0/20:2)	-2.31784	2.64e-20	7.09e-20
PE(18:0/20:2)	-2.31419	1.59e-19	3.94e-19
PC(16:0/18:2)	-2.31005	1.28e-19	3.2e-19
TAG52:6-FA14:0	-2.30825	6.2e-17	1.2e-16
TAG54:5-FA18:3	-2.30242	1.5e-19	3.71e-19
LPC(18:1)	-2.3003	1.28e-16	2.42e-16
PC(20:0/18:1)	-2.29986	0.002189	0.002401
DAG(16:1/18:1)	-2.28997	0.01521	0.016204
TAG52:2-FA18:1	-2.28601	6.46e-20	1.67e-19
TAG54:6-FA20:3	-2.28267	1.71e-18	3.88e-18
TAG52:5-FA20:5	-2.27975	2.49e-20	6.7e-20
TAG52:1-FA18:0	-2.27493	4.34e-20	1.14e-19
PC(16:0/16:0)	-2.27371	2.95e-08	3.68e-08
TAG52:4-FA18:0	-2.26424	5.06e-18	1.08e-17
TAG54:4-FA22:1	-2.25792	4.15e-11	5.68e-11
TAG56:3-FA18:1	-2.24787	9.52e-19	2.18e-18
DAG(14:0/18:1)	-2.24726	0.003919	0.00426
LPC(20:1)	-2.24329	7.96e-13	1.15e-12
PE(O-16:0/16:1)	-2.24063	2.49e-16	4.62e-16
PE(18:2/20:2)	-2.23923	5.16e-10	6.81e-10
TAG54:7-FA18:2	-2.23872	2.61e-19	6.34e-19
TAG56:5-FA18:1	-2.23694	1.77e-19	4.36e-19
PC(18:1/18:3)	-2.23564	2.29e-20	6.25e-20
PE(16:0/15:0)	-2.23538	6.17e-06	7.25e-06
TAG54:4-FA20:3	-2.23212	6.88e-20	1.76e-19
PC(16:0/12:0)	-2.22975	7.38e-14	1.13e-13
TAG56:3-FA20:1	-2.22844	2.32e-18	5.19e-18
DAG(15:0/18:1)	-2.22244	0.028034	0.029463
PC(18:2/18:2)	-2.21738	5.64e-20	1.47e-19
TAG56:5-FA16:0	-2.21534	1e-10	1.35e-10
TAG52:3-FA18:1	-2.20763	4.05e-18	8.85e-18
TAG58:7-FA18:1	-2.20037	1.91e-18	4.29e-18
TAG51:2-FA16:0	-2.19898	7.97e-20	2.03e-19
TAG56:2-FA18:0	-2.19779	6.85e-19	1.59e-18
PE(16:0/17:0)	-2.19716	9.72e-05	0.000111
TAG54:1-FA20:0	-2.194	4.97e-18	1.07e-17
PC(15:0/20:3)	-2.19235	5.63e-16	1.02e-15
TAG52:2-FA18:0	-2.18986	3.66e-18	8.03e-18
PC(18:1/18:4)	-2.18867	5.94e-07	7.13e-07
TAG52:7-FA20:5	-2.18687	6.82e-18	1.44e-17
TAG54:2-FA16:0	-2.18426	2.4e-18	5.34e-18
LCER(20:1)	-2.17829	0.000159	0.000181
PE(O-16:0/20:1)	-2.17781	1.49e-09	1.93e-09
TAG54:6-FA16:1	-2.17417	2.18e-17	4.38e-17
PE(18:2/18:3)	-2.17259	1.65e-05	1.92e-05
TAG48:4-FA18:1	-2.17032	1.41e-15	2.44e-15
TAG56:2-FA20:1	-2.16804	1.2e-18	2.74e-18
TAG50:5-FA18:1	-2.16083	1.08e-16	2.05e-16
TAG56:4-FA18:0	-2.15499	1.67e-18	3.79e-18
PC(16:0/16:1)	-2.15403	8.96e-19	2.07e-18
TAG56:7-FA20:3	-2.14944	1.26e-17	2.58e-17
TAG56:2-FA20:0	-2.13479	2.23e-17	4.47e-17
PC(14:0/18:2)	-2.13033	9.32e-16	1.65e-15
TAG53:4-FA16:0	-2.12784	9.09e-19	2.1e-18
TAG56:8-FA16:1	-2.12747	2.12e-16	3.95e-16
PE(17:0/18:3)	-2.11897	4.32e-14	6.74e-14
TAG53:0-FA16:0	-2.11535	6.21e-18	1.32e-17
PC(18:1/18:2)	-2.11287	1.05e-17	2.19e-17
TAG54:2-FA18:0	-2.10802	1.2e-17	2.48e-17
TAG56:7-FA16:0	-2.10362	6.19e-17	1.2e-16
PE(14:0/18:1)	-2.10251	1.11e-15	1.95e-15
TAG56:7-FA18:3	-2.10152	2.66e-18	5.89e-18
TAG54:2-FA18:1	-2.09453	1.21e-17	2.49e-17
PE(O-18:0/20:1)	-2.091	2.7e-20	7.21e-20
PE(17:0/20:5)	-2.09013	7.7e-06	9.02e-06
TAG55:3-FA18:1	-2.08519	6.06e-18	1.29e-17
TAG58:10-FA18:2	-2.08153	4.67e-18	1.01e-17
TAG54:7-FA16:1	-2.07832	1.79e-16	3.35e-16
TAG50:4-FA20:4	-2.0781	1.28e-15	2.23e-15
TAG57:3-FA18:2	-2.07274	1.21e-17	2.49e-17
TAG56:7-FA18:2	-2.06978	1.83e-18	4.13e-18
PE(14:0/20:3)	-2.06888	5.26e-06	6.2e-06
TAG52:4-FA20:4	-2.06762	2.52e-18	5.59e-18
TAG56:8-FA18:2	-2.06519	1.15e-17	2.39e-17
TAG54:1-FA18:0	-2.06351	1.37e-17	2.79e-17
PC(18:2/16:1)	-2.06037	1.13e-15	1.99e-15
TAG56:4-FA20:3	-2.05883	2.76e-17	5.47e-17
TAG56:8-FA20:5	-2.05577	3.25e-18	7.16e-18
TAG53:2-FA16:0	-2.05223	6.78e-18	1.43e-17
PE(16:0/16:0)	-2.049	1.49e-15	2.56e-15
TAG54:3-FA18:1	-2.04866	1.17e-16	2.23e-16
TAG55:2-FA18:1	-2.04208	4.03e-18	8.83e-18
TAG56:5-FA20:3	-2.03482	2.05e-17	4.15e-17
TAG54:1-FA16:0	-2.03218	3.18e-16	5.87e-16
TAG52:1-FA16:0	-2.02365	5.51e-17	1.08e-16
TAG52:2-FA16:0	-2.02213	1.08e-16	2.05e-16
TAG54:5-FA20:5	-2.02168	5.46e-18	1.16e-17
TAG52:6-FA16:0	-2.01428	8.93e-16	1.59e-15
TAG54:1-FA18:1	-2.01368	2.46e-17	4.91e-17
TAG56:8-FA18:1	-2.01123	1.08e-17	2.25e-17
TAG52:6-FA20:5	-2.00703	7.2e-17	1.39e-16
TAG58:7-FA20:4	-2.00632	4.24e-17	8.35e-17
TAG58:6-FA18:0	-2.00022	9.26e-15	1.53e-14
