# Supplementary material for: The lipidomes of C. elegans with mutations in asm-3/acid sphingomyelinase and hyl-2/ceramide synthase show distinct lipid profiles during aging
Source: Aging (Albany NY). 2023 Feb 13;15(3):650–74. doi: 10.18632/aging.204515 (PMC9970312; doi:10.18632/aging.204515)
Supplement: Supplementary Table 4 [file aging-15-204515-s005.xlsx]

## Sheet: Supplemental Table 4
Supplemental Table 4. Lipid fold changes between 10-day N2 and 10-day hyl-2 animals.
lipid	logFC	P.Value	FDR
DAG(18:1/18:2)	-3.61137	0.008729	0.010532
TAG54:7-FA18:1	2.00112	2.08e-16	1.24e-15
PC(12:0/18:3)	2.00124	2.98e-06	4.38e-06
TAG52:8-FA16:1	2.00222	1.91e-16	1.15e-15
TAG58:3-FA18:1	2.00344	5.12e-16	2.66e-15
TAG44:2-FA18:1	2.01154	1.29e-11	3.11e-11
PC(18:0/20:4)	2.01253	5.54e-17	3.85e-16
TAG52:3-FA20:1	2.01498	3.09e-15	1.32e-14
TAG46:2-FA16:0	2.01584	4.54e-14	1.56e-13
TAG54:3-FA18:1	2.01665	2.47e-16	1.42e-15
TAG52:5-FA16:0	2.01746	3.15e-18	2.83e-17
PE(18:2/18:2)	2.021	7.57e-17	5.15e-16
TAG50:2-FA16:1	2.03118	1.74e-15	7.92e-15
TAG54:5-FA16:0	2.04318	1.72e-17	1.27e-16
TAG52:1-FA20:0	2.04495	1.99e-15	8.99e-15
TAG56:2-FA20:1	2.04558	2.22e-17	1.6e-16
TAG50:3-FA18:1	2.05389	1.17e-15	5.63e-15
TAG56:1-FA18:1	2.05926	3.1e-18	2.83e-17
TAG48:2-FA16:1	2.0602	2.29e-14	8.49e-14
TAG50:4-FA14:0	2.06324	7.82e-14	2.59e-13
PC(18:1/16:1)	2.06762	2e-18	1.95e-17
TAG56:6-FA18:0	2.06931	2.33e-18	2.24e-17
TAG55:1-FA16:0	2.07331	7.74e-18	6.24e-17
FFA(18:0)	2.07363	2.28e-16	1.32e-15
LPE(20:2)	2.08261	2.72e-14	9.83e-14
TAG56:8-FA16:0	2.08284	4.27e-18	3.61e-17
TAG46:1-FA18:1	2.08389	3.66e-13	1.08e-12
TAG54:2-FA18:1	2.09014	1.34e-17	1.01e-16
TAG50:1-FA18:0	2.09194	2.2e-16	1.28e-15
TAG54:1-FA18:1	2.0937	3.55e-18	3.11e-17
PC(16:0/16:1)	2.09881	3.37e-18	2.99e-17
PC(12:0/18:2)	2.102	1.04e-14	4.02e-14
TAG56:3-FA20:0	2.10209	9.83e-17	6.5e-16
PC(14:0/16:1)	2.10378	3.13e-06	4.59e-06
TAG56:4-FA18:0	2.10568	5.38e-18	4.49e-17
TAG58:6-FA18:0	2.1125	8.04e-16	3.97e-15
TAG52:5-FA16:1	2.11383	5.79e-16	2.96e-15
TAG52:1-FA18:0	2.12006	1.75e-18	1.76e-17
TAG45:0-FA14:0	2.12902	5.11e-13	1.47e-12
TAG46:1-FA12:0	2.13956	1.46e-14	5.53e-14
PE(18:0/20:4)	2.14258	4.93e-17	3.53e-16
TAG50:3-FA14:0	2.14354	1.4e-14	5.35e-14
TAG56:6-FA20:4	2.14391	2.52e-19	3.16e-18
TAG50:5-FA16:1	2.15541	9.64e-10	1.89e-09
TAG46:2-FA18:1	2.17399	5.9e-15	2.44e-14
TAG52:4-FA16:1	2.18058	5.45e-16	2.81e-15
TAG48:3-FA12:0	2.18358	1.02e-13	3.31e-13
TAG54:1-FA20:0	2.18941	5.52e-18	4.55e-17
TAG58:6-FA20:4	2.19006	1.41e-19	1.83e-18
TAG52:3-FA14:0	2.19009	1.5e-15	6.96e-15
TAG56:5-FA16:0	2.1919	1.43e-10	3.04e-10
TAG50:2-FA16:0	2.19737	3.98e-18	3.44e-17
TAG44:1-FA12:0	2.2118	6.82e-13	1.92e-12
TAG58:8-FA20:4	2.21269	1.22e-19	1.61e-18
TAG50:3-FA16:0	2.21652	8.92e-17	5.96e-16
TAG48:4-FA14:0	2.22155	1.41e-13	4.45e-13
PC(12:0/20:4)	2.22514	8.98e-15	3.56e-14
LPC(20:2)	2.2254	7.64e-15	3.06e-14
LPC(18:3)	2.22765	3.8e-05	5.14e-05
TAG58:10-FA20:4	2.23015	1.63e-20	3e-19
PE(P-18:0/16:1)	2.23118	2.82e-21	8.99e-20
TAG52:6-FA14:0	2.23664	2.77e-16	1.57e-15
TAG56:9-FA20:4	2.23902	8.08e-20	1.26e-18
PC(18:0/16:1)	2.23971	1.73e-19	2.21e-18
TAG54:2-FA16:0	2.24944	5.29e-19	6.18e-18
TAG54:4-FA16:1	2.25066	2.13e-16	1.25e-15
PE(P-18:1/16:1)	2.25195	5.08e-13	1.47e-12
TAG52:2-FA16:0	2.26194	4e-19	4.92e-18
TAG56:5-FA18:0	2.26346	8.12e-20	1.26e-18
PC(12:0/20:3)	2.26602	3.4e-15	1.44e-14
TAG56:2-FA18:0	2.27293	1.17e-19	1.58e-18
TAG52:6-FA20:4	2.27507	5.11e-19	6.07e-18
TAG48:1-FA14:0	2.28161	1.77e-16	1.08e-15
TAG44:2-FA14:0	2.2824	5.14e-06	7.38e-06
LPC(18:2)	2.29078	1.96e-12	5.17e-12
TAG52:6-FA16:0	2.29091	1.76e-18	1.76e-17
TAG54:7-FA20:4	2.2961	4.34e-19	5.24e-18
FFA(14:0)	2.29771	6.85e-22	2.89e-20
TAG52:4-FA14:0	2.30201	1.2e-16	7.7e-16
TAG54:7-FA16:1	2.30885	9.95e-19	1.11e-17
TAG48:2-FA18:0	2.31074	1.34e-16	8.49e-16
TAG52:4-FA18:0	2.31403	1.68e-18	1.73e-17
TAG54:0-FA16:0	2.31869	9.99e-17	6.54e-16
LPE(20:1)	2.32854	2.95e-18	2.72e-17
TAG56:4-FA20:4	2.34101	6.25e-21	1.51e-19
TAG54:5-FA16:1	2.34689	1.98e-18	1.95e-17
TAG50:5-FA14:0	2.34698	2.96e-15	1.27e-14
TAG54:8-FA20:4	2.34802	1.07e-18	1.18e-17
PC(12:0/18:1)	2.35377	3.13e-16	1.74e-15
TAG54:6-FA20:4	2.35695	3.98e-21	1.14e-19
LPE(16:1)	2.35872	1.5e-15	6.96e-15
PC(16:0/12:0)	2.35936	6.59e-15	2.68e-14
TAG50:4-FA16:1	2.36142	3.19e-16	1.76e-15
TAG56:5-FA20:4	2.36163	2.16e-21	7.57e-20
TAG44:0-FA16:0	2.36345	2.67e-06	3.96e-06
TAG52:0-FA16:0	2.36985	4.7e-20	8.04e-19
TAG52:1-FA16:0	2.3777	1.37e-20	2.66e-19
TAG54:5-FA18:0	2.37884	1.27e-20	2.54e-19
LPC(20:5)	2.38197	2.89e-13	8.7e-13
TAG58:9-FA20:4	2.3902	2.82e-22	1.52e-20
TAG50:3-FA16:1	2.39275	1.4e-18	1.49e-17
TAG46:1-FA14:0	2.39927	1.51e-15	6.96e-15
TAG52:5-FA14:0	2.40112	6.38e-18	5.2e-17
TAG48:2-FA18:1	2.40876	6.67e-17	4.58e-16
TAG48:3-FA16:1	2.41858	4.06e-18	3.47e-17
TAG54:2-FA18:0	2.42716	7.52e-21	1.76e-19
TAG48:2-FA16:0	2.43334	2.51e-18	2.35e-17
TAG56:7-FA16:1	2.43654	3.09e-14	1.1e-13
TAG46:0-FA18:0	2.43783	4.27e-08	7.08e-08
TAG44:2-FA16:1	2.43866	4.3e-16	2.3e-15
TAG52:3-FA18:0	2.43964	1.03e-19	1.47e-18
LPE(18:1)	2.44342	8.54e-17	5.76e-16
CE(18:2)	2.45112	3.95e-10	7.96e-10
TAG52:6-FA16:1	2.46041	8.08e-21	1.83e-19
TAG50:6-FA20:4	2.47474	6.96e-13	1.94e-12
TAG56:8-FA16:1	2.47567	1.06e-19	1.47e-18
TAG54:0-FA18:0	2.47652	4.39e-21	1.14e-19
TAG54:6-FA16:1	2.48014	2.42e-20	4.35e-19
TAG52:2-FA18:0	2.48152	4.88e-21	1.22e-19
TAG44:2-FA12:0	2.48472	4.46e-07	6.94e-07
PC(18:0/12:0)	2.49404	1.45e-13	4.48e-13
PE(14:0/20:4)	2.52602	6.86e-11	1.52e-10
LPC(20:1)	2.53393	4.98e-15	2.09e-14
LPE(18:2)	2.53452	1.28e-11	3.11e-11
PC(12:0/16:1)	2.54215	3.65e-05	4.96e-05
TAG50:5-FA20:4	2.5489	1e-19	1.47e-18
TAG54:3-FA16:1	2.56343	9.63e-21	2.11e-19
LPC(20:3)	2.56404	1.12e-17	8.92e-17
TAG46:2-FA12:0	2.56961	1.6e-17	1.2e-16
TAG44:1-FA16:0	2.57931	4.92e-14	1.68e-13
TAG54:1-FA18:0	2.5901	6.59e-23	5.2e-21
TAG54:2-FA20:0	2.59807	9.24e-22	3.41e-20
TAG58:2-FA18:1	2.61843	1.5e-22	9.57e-21
CE(18:1)	2.62508	1.2e-17	9.43e-17
TAG56:2-FA20:0	2.62583	3.75e-22	1.88e-20
TAG52:3-FA16:1	2.63022	1.27e-20	2.54e-19
TAG56:6-FA22:4	2.64353	1.47e-14	5.55e-14
TAG48:2-FA12:0	2.64937	2.41e-18	2.29e-17
TAG52:2-FA14:0	2.659	1.07e-19	1.47e-18
PC(12:0/20:1)	2.66014	0.000128	0.000168
LPC(20:4)	2.66458	1.21e-17	9.44e-17
LPE(20:3)	2.66786	5.42e-17	3.82e-16
TAG50:2-FA18:0	2.67021	3.74e-21	1.14e-19
TAG50:0-FA14:0	2.70034	8.29e-20	1.26e-18
TAG48:2-FA14:0	2.70214	5.73e-20	9.57e-19
TAG50:2-FA14:0	2.71063	4.04e-20	7.07e-19
TAG52:2-FA16:1	2.71354	5.91e-22	2.76e-20
TAG58:6-FA22:4	2.71809	9.02e-14	2.97e-13
TAG48:3-FA14:0	2.72659	5.79e-19	6.65e-18
TAG46:1-FA16:0	2.72957	1.32e-18	1.42e-17
TAG48:1-FA12:0	2.73291	7.12e-19	8.06e-18
TAG54:1-FA16:0	2.73317	5.35e-23	5.2e-21
LPE(20:5)	2.73697	4.37e-09	7.84e-09
TAG56:2-FA16:0	2.73707	1.06e-20	2.25e-19
TAG52:1-FA16:1	2.74675	1.45e-22	9.57e-21
LPE(20:0)	2.75245	4.27e-21	1.14e-19
TAG46:1-FA18:0	2.7636	1.37e-15	6.53e-15
TAG50:1-FA14:0	2.77358	4.33e-21	1.14e-19
TAG46:2-FA16:1	2.78774	1.44e-18	1.51e-17
TAG44:1-FA16:1	2.8057	3.22e-16	1.76e-15
LPE(20:4)	2.80696	2.65e-14	9.69e-14
LPE(16:0)	2.83601	9.98e-24	1.4e-21
SM(16:0)	2.86155	7.09e-26	2.49e-23
TAG52:2-FA20:0	2.87453	7.41e-22	2.89e-20
TAG46:2-FA14:0	2.87648	1.04e-19	1.47e-18
TAG42:1-FA14:0	2.91715	1.71e-07	2.74e-07
LPC(18:1)	2.95421	2.54e-22	1.48e-20
CE(20:5)	2.96775	2.32e-24	4.06e-22
LPC(16:0)	2.9795	2.48e-21	8.27e-20
TAG48:1-FA18:0	3.00003	7.3e-22	2.89e-20
TAG42:0-FA14:0	3.00269	4.8e-05	6.48e-05
LPC(16:1)	3.0082	1.99e-09	3.73e-09
LPE(18:0)	3.08653	4.54e-25	1.06e-22
CE(20:4)	3.09656	1.76e-11	4.16e-11
LPC(18:0)	3.10499	1.22e-23	1.43e-21
TAG56:1-FA16:0	3.22432	2.25e-26	1.58e-23
TAG44:1-FA14:0	3.37183	1.41e-20	2.66e-19
LPC(20:0)	3.67579	1.92e-06	2.87e-06
DAG(18:1/18:2)	-3.61137
