# Supplementary material for: The lipidomes of C. elegans with mutations in asm-3/acid sphingomyelinase and hyl-2/ceramide synthase show distinct lipid profiles during aging
Source: Aging (Albany NY). 2023 Feb 13;15(3):650–74. doi: 10.18632/aging.204515 (PMC9970312; doi:10.18632/aging.204515)
Supplement: Supplementary Table 5 [file aging-15-204515-s006.xlsx]

## Sheet: Supplemental Table 5
Supplemental Table 5. Lipid fold changes between 5-day N2 and 1-day N2 animals
lipid	logFC	P.Value	FDR
PC(16:0/20:3)	2.01257	7.79e-16	1.67e-15
TAG50:1-FA14:0	2.01539	2.78e-14	5.42e-14
TAG56:2-FA16:0	2.01834	2.97e-14	5.75e-14
TAG52:2-FA14:0	2.0266	4.49e-14	8.51e-14
PE(17:0/16:1)	2.0279	1.31e-06	1.78e-06
TAG50:2-FA18:1	2.02997	9.53e-16	2.02e-15
TAG50:2-FA14:0	2.03344	4.07e-14	7.77e-14
PE(O-18:0/14:1)	2.03836	1.44e-07	2.04e-07
TAG54:5-FA16:0	2.03869	1.91e-17	4.46e-17
TAG49:2-FA18:1	2.039	2.33e-16	5.08e-16
PE(15:0/18:1)	2.05259	0.000195	0.000242
PE(17:0/20:3)	2.05611	7.73e-08	1.12e-07
TAG51:4-FA20:4	2.0578	5.18e-18	1.29e-17
TAG51:2-FA15:0	2.0583	7.11e-18	1.74e-17
TAG49:1-FA14:0	2.06609	1.99e-15	4.18e-15
TAG46:1-FA18:1	2.06785	4.98e-13	8.92e-13
TAG50:0-FA14:0	2.07262	2.72e-14	5.32e-14
TAG46:3-FA18:2	2.07759	9.8e-14	1.82e-13
PC(18:0/20:5)	2.08259	7.11e-20	2.06e-19
PE(16:0/18:1)	2.08362	7.41e-20	2.14e-19
PC(20:0/18:1)	2.08882	0.005157	0.006055
TAG49:1-FA17:0	2.09559	4.42e-18	1.11e-17
DAG(16:1/16:1)	2.09588	0.000747	0.000907
TAG52:2-FA20:0	2.09724	5.97e-15	1.22e-14
FFA(20:2)	2.10161	2.92e-34	6.03e-33
TAG51:1-FA15:0	2.1028	7.53e-19	1.99e-18
TAG52:3-FA18:2	2.10341	6.33e-18	1.56e-17
PE(17:0/18:2)	2.10703	4.27e-06	5.65e-06
PC(18:1/20:5)	2.11029	6.33e-21	1.92e-20
PC(16:0/20:4)	2.11079	2.44e-18	6.26e-18
TAG50:0-FA18:0	2.11553	3.98e-18	1e-17
PE(O-18:0/20:4)	2.12122	7.29e-18	1.78e-17
TAG54:1-FA20:0	2.12331	2.52e-17	5.82e-17
PE(P-18:0/20:4)	2.13084	1.03e-17	2.45e-17
TAG49:1-FA16:1	2.13284	4.1e-17	9.36e-17
TAG52:6-FA20:5	2.1341	3.5e-18	8.89e-18
TAG46:1-FA16:1	2.13575	4.81e-15	9.89e-15
TAG50:2-FA18:2	2.13837	2.73e-17	6.29e-17
TAG48:2-FA18:1	2.13869	1.51e-14	2.98e-14
TAG48:3-FA14:0	2.14347	4.71e-14	8.91e-14
TAG52:4-FA18:2	2.15438	1.52e-17	3.57e-17
PC(16:0/18:0)	2.15541	3.71e-18	9.39e-18
TAG52:3-FA16:0	2.15587	1e-17	2.41e-17
TAG52:4-FA14:0	2.15765	2.39e-15	4.97e-15
PE(P-18:0/16:0)	2.16353	1.72e-16	3.78e-16
TAG54:3-FA20:3	2.17015	1.09e-18	2.82e-18
TAG54:0-FA18:0	2.17056	4.69e-18	1.17e-17
PC(16:0/16:1)	2.17369	5.6e-19	1.49e-18
TAG52:5-FA18:1	2.17526	3.36e-18	8.56e-18
TAG48:2-FA16:1	2.17557	2.1e-15	4.4e-15
TAG51:2-FA17:0	2.18661	3.45e-19	9.33e-19
TAG50:5-FA20:5	2.19032	5.42e-18	1.34e-17
PE(18:2/20:1)	2.19121	1.75e-18	4.51e-18
PE(17:0/22:5)	2.19648	2.85e-13	5.22e-13
TAG56:8-FA16:0	2.19675	2.77e-19	7.61e-19
TAG56:8-FA18:3	2.21262	2.19e-19	6.1e-19
TAG44:2-FA14:0	2.21305	9.13e-06	1.19e-05
TAG47:1-FA17:0	2.21625	9.07e-17	2.03e-16
TAG49:0-FA15:0	2.22667	8.22e-20	2.35e-19
PC(18:0/18:2)	2.23776	9.1e-19	2.37e-18
TAG48:1-FA18:1	2.24917	1.02e-17	2.44e-17
PC(16:0/18:1)	2.24997	4.82e-22	1.57e-21
PC(15:0/18:1)	2.25661	5.2e-22	1.68e-21
PC(18:0/20:3)	2.25923	8.04e-18	1.96e-17
TAG54:7-FA18:2	2.26513	1.4e-19	3.95e-19
TAG48:4-FA14:1	2.26907	3.82e-15	7.91e-15
TAG52:5-FA20:3	2.27534	8.1e-18	1.96e-17
PE(18:2/20:4)	2.27611	3.21e-19	8.76e-19
TAG52:3-FA18:1	2.27648	8.46e-19	2.23e-18
PC(20:0/20:5)	2.2769	1.59e-16	3.53e-16
TAG48:4-FA18:2	2.27701	6.05e-18	1.49e-17
LCER(18:0)	2.27873	0.000103	0.000129
PE(18:1/20:1)	2.27939	2.64e-22	8.78e-22
TAG54:0-FA16:0	2.29258	1.71e-16	3.77e-16
TAG47:0-FA17:0	2.31366	2.35e-19	6.49e-19
LPC(17:0)	2.32084	1.81e-16	3.97e-16
CE(18:2)	2.3319	1.85e-09	2.86e-09
PE(P-18:1/20:4)	2.33391	8.86e-19	2.32e-18
TAG51:3-FA18:2	2.33706	2.61e-20	7.69e-20
PE(P-18:1/18:0)	2.33879	1.67e-22	5.67e-22
TAG55:1-FA16:0	2.34484	1.24e-20	3.71e-20
TAG48:3-FA18:1	2.34916	8.68e-19	2.28e-18
PE(O-16:0/20:2)	2.35054	1.36e-10	2.22e-10
TAG44:2-FA12:0	2.35076	1.49e-06	2.03e-06
SM(18:0)	2.35175	2.48e-08	3.66e-08
TAG52:0-FA18:0	2.3522	2.59e-21	8.07e-21
TAG50:4-FA18:2	2.35538	8.78e-18	2.12e-17
TAG52:5-FA14:0	2.35592	1.64e-17	3.83e-17
TAG50:2-FA16:1	2.35847	1.29e-18	3.34e-18
TAG50:5-FA16:1	2.36165	4.84e-11	8.06e-11
TAG46:2-FA14:0	2.3699	1.46e-15	3.08e-15
PE(17:0/18:1)	2.37886	0.000818	0.000992
TAG52:6-FA18:1	2.37979	8.64e-20	2.46e-19
TAG47:2-FA16:1	2.38258	5.31e-18	1.32e-17
SM(22:1)	2.38662	2.9e-14	5.63e-14
TAG46:3-FA16:1	2.38775	4.78e-19	1.29e-18
TAG54:6-FA18:2	2.39476	1.23e-19	3.48e-19
TAG50:4-FA18:1	2.39589	5.42e-19	1.45e-18
TAG50:3-FA14:0	2.39835	8.44e-17	1.9e-16
TAG48:4-FA18:1	2.39914	1.21e-17	2.87e-17
TAG52:2-FA18:1	2.40449	4.11e-21	1.26e-20
TAG49:2-FA17:0	2.41576	2.82e-20	8.26e-20
PE(15:0/20:2)	2.41836	0.000144	0.000179
SM(16:0)	2.4202	1.43e-21	4.53e-21
PC(18:0/18:1)	2.42438	1.22e-23	4.74e-23
TAG49:2-FA16:1	2.42723	1.03e-19	2.92e-19
TAG52:2-FA18:2	2.42793	3.69e-21	1.14e-20
TAG46:3-FA18:1	2.42922	3.21e-19	8.76e-19
TAG48:3-FA12:0	2.43969	8.15e-16	1.74e-15
TAG50:3-FA16:1	2.44001	5.12e-19	1.38e-18
TAG52:0-FA20:0	2.44084	3.33e-19	9.05e-19
TAG51:1-FA17:0	2.44251	1.04e-22	3.64e-22
TAG48:1-FA16:1	2.44288	5.93e-19	1.57e-18
TAG51:4-FA18:2	2.44782	1.74e-20	5.18e-20
TAG50:4-FA14:1	2.45584	3.35e-18	8.56e-18
PC(18:0/16:1)	2.45627	1.12e-21	3.58e-21
TAG56:5-FA16:0	2.4614	2.3e-12	4.02e-12
PC(17:0/16:1)	2.46732	1.08e-17	2.56e-17
TAG56:7-FA16:0	2.47414	1.48e-20	4.42e-20
TAG53:4-FA18:2	2.4872	1.94e-22	6.52e-22
PE(18:0/18:2)	2.48732	3.68e-21	1.14e-20
TAG56:9-FA18:3	2.48961	4.61e-24	1.88e-23
TAG52:6-FA16:1	2.49391	3.83e-21	1.18e-20
TAG44:1-FA14:0	2.49493	3.19e-14	6.17e-14
TAG56:8-FA22:6	2.49745	5.25e-14	9.9e-14
PE(17:0/20:4)	2.50051	1.67e-09	2.59e-09
TAG52:5-FA18:2	2.50152	2.04e-19	5.69e-19
PE(O-18:0/16:1)	2.50367	1.08e-24	4.91e-24
PC(18:0/20:4)	2.51329	4.6e-22	1.51e-21
TAG54:6-FA16:0	2.51988	1.09e-22	3.77e-22
TAG51:2-FA18:1	2.52585	1.2e-22	4.14e-22
TAG52:7-FA18:1	2.53135	5.65e-23	2e-22
TAG51:1-FA18:1	2.53685	2.26e-23	8.49e-23
TAG44:2-FA16:1	2.53984	6.29e-17	1.42e-16
TAG56:6-FA16:0	2.54297	1.55e-15	3.27e-15
TAG42:1-FA14:0	2.54785	3.27e-06	4.36e-06
TAG53:4-FA17:0	2.55061	1.57e-22	5.35e-22
TAG42:0-FA14:0	2.55255	0.000455	0.000557
TAG55:5-FA18:1	2.5561	4.43e-24	1.81e-23
TAG54:6-FA20:5	2.55809	1.17e-23	4.57e-23
TAG52:5-FA16:1	2.5618	3.82e-20	1.11e-19
PC(16:0/16:0)	2.56422	9.8e-10	1.53e-09
TAG50:4-FA20:4	2.58857	2.21e-20	6.53e-20
TAG56:1-FA16:0	2.59423	8.28e-21	2.5e-20
TAG52:5-FA20:5	2.59465	1.63e-23	6.21e-23
PE(18:2/18:2)	2.60615	1.06e-22	3.7e-22
TAG52:5-FA20:4	2.60741	5.51e-23	1.96e-22
CE(18:1)	2.61327	1.5e-17	3.52e-17
TAG50:1-FA16:1	2.61556	1.46e-21	4.6e-21
PE(15:0/16:1)	2.61578	3.29e-06	4.38e-06
TAG44:1-FA16:1	2.61942	7.22e-15	1.47e-14
PE(18:1/18:1)	2.63727	1.38e-26	8.51e-26
TAG53:4-FA20:4	2.64006	3.19e-24	1.33e-23
TAG54:6-FA20:3	2.64154	6.52e-22	2.09e-21
PE(P-18:0/18:2)	2.64453	1.51e-23	5.8e-23
TAG51:3-FA17:0	2.6458	1.72e-23	6.5e-23
PC(18:1/20:3)	2.65154	1.26e-22	4.33e-22
TAG56:4-FA20:3	2.65353	3.25e-23	1.19e-22
TAG56:7-FA22:5	2.65849	1.58e-19	4.43e-19
PE(P-18:0/16:1)	2.66289	8.39e-26	4.42e-25
TAG55:3-FA18:1	2.66553	8.61e-24	3.39e-23
TAG50:3-FA18:1	2.66779	1.97e-21	6.18e-21
TAG54:6-FA18:1	2.68228	1.47e-23	5.66e-23
TAG46:2-FA16:1	2.69238	8.38e-18	2.02e-17
PE(P-18:1/18:1)	2.69366	4.81e-26	2.68e-25
TAG48:4-FA16:1	2.69874	8.14e-12	1.39e-11
PE(18:1/16:1)	2.70043	1.7e-27	1.18e-26
TAG51:4-FA16:1	2.70348	5.42e-22	1.74e-21
TAG54:7-FA20:5	2.70355	1.38e-24	6.07e-24
CE(20:5)	2.70797	4.94e-22	1.6e-21
TAG56:7-FA20:3	2.70994	4.61e-23	1.67e-22
SM(24:1)	2.71323	9.81e-32	1.3e-30
TAG51:3-FA16:1	2.71539	2.55e-22	8.5e-22
TAG52:2-FA20:1	2.73218	3.61e-22	1.19e-21
TAG55:4-FA18:2	2.73482	1.98e-24	8.53e-24
TAG50:1-FA18:1	2.74369	2.9e-24	1.22e-23
TAG54:5-FA20:5	2.74467	2e-25	1.01e-24
TAG55:5-FA18:2	2.74477	2.88e-24	1.21e-23
TAG54:1-FA18:0	2.74828	1.97e-24	8.53e-24
TAG56:4-FA18:0	2.75363	1.92e-24	8.34e-24
TAG54:3-FA20:1	2.75543	4.13e-23	1.5e-22
TAG54:2-FA18:2	2.7583	3.24e-23	1.19e-22
TAG56:10-FA18:2	2.76008	6.66e-24	2.65e-23
TAG53:2-FA18:2	2.76232	5.29e-25	2.49e-24
PE(P-18:1/18:2)	2.76293	2.53e-23	9.42e-23
TAG52:6-FA14:0	2.76341	5.61e-21	1.71e-20
PC(18:1/20:1)	2.77016	3.35e-20	9.77e-20
TAG49:0-FA17:0	2.77569	6.29e-25	2.94e-24
PC(18:1/18:2)	2.77622	3.22e-24	1.34e-23
PC(18:1/20:4)	2.77977	1.09e-24	4.91e-24
TAG54:8-FA18:2	2.78011	5.01e-23	1.8e-22
TAG55:3-FA18:2	2.78474	7.97e-25	3.7e-24
TAG53:1-FA18:0	2.78654	7.74e-26	4.14e-25
PC(18:1/18:1)	2.80962	8.11e-27	5.12e-26
LCER(20:1)	2.81505	2.11e-06	2.84e-06
TAG54:2-FA18:0	2.81779	1.35e-24	5.98e-24
TAG56:2-FA20:0	2.82758	4.98e-24	2.02e-23
TAG52:2-FA16:1	2.8504	3.46e-23	1.26e-22
TAG56:2-FA18:0	2.85329	2.55e-25	1.26e-24
TAG50:5-FA20:4	2.85861	1.75e-22	5.88e-22
PE(18:1/20:4)	2.86192	3.91e-24	1.61e-23
TAG52:7-FA20:5	2.87585	1.82e-24	7.99e-24
TAG51:3-FA15:0	2.87696	2.79e-25	1.34e-24
TAG52:1-FA16:1	2.88499	8.19e-24	3.25e-23
TAG56:6-FA18:3	2.89541	1.63e-25	8.3e-25
TAG54:7-FA22:6	2.89808	4.31e-09	6.57e-09
TAG54:3-FA18:2	2.91161	7.99e-26	4.24e-25
TAG56:4-FA18:2	2.91462	2.73e-25	1.32e-24
TAG52:8-FA16:1	2.9156	2.39e-25	1.19e-24
TAG49:3-FA16:1	2.91587	1.47e-23	5.66e-23
TAG54:5-FA18:1	2.91595	2.58e-25	1.26e-24
TAG48:3-FA16:1	2.91694	1.63e-22	5.54e-22
TAG54:5-FA20:4	2.92085	4.66e-27	3.03e-26
TAG56:3-FA18:1	2.9364	2.58e-25	1.26e-24
TAG56:5-FA20:3	2.94036	2.18e-26	1.27e-25
PE(O-18:0/18:2)	2.95424	1.99e-26	1.18e-25
TAG56:7-FA18:0	2.95622	1.68e-27	1.18e-26
TAG52:4-FA20:4	2.95966	2.78e-27	1.86e-26
TAG52:3-FA20:1	2.96118	5.42e-24	2.17e-23
PE(P-18:0/20:2)	2.96559	1.38e-26	8.51e-26
PE(16:0/20:2)	2.97633	1.33e-24	5.95e-24
PE(18:2/16:1)	2.97948	8.1e-27	5.12e-26
TAG54:6-FA22:5	2.98763	2.13e-17	4.96e-17
TAG54:3-FA16:1	2.99397	1.23e-24	5.53e-24
TAG53:3-FA18:2	3.00261	3.65e-27	2.39e-26
PE(O-18:0/20:2)	3.0079	1.14e-26	7.15e-26
TAG50:6-FA20:4	3.01063	1.43e-16	3.17e-16
TAG51:2-FA16:1	3.01752	9.76e-26	5.1e-25
TAG55:2-FA18:1	3.02785	5.27e-28	3.85e-27
TAG56:5-FA18:0	3.02855	3.06e-27	2.02e-26
TAG56:3-FA18:2	3.02988	1.33e-25	6.8e-25
TAG54:2-FA20:1	3.03171	2.75e-26	1.57e-25
TAG51:0-FA17:0	3.03386	1.75e-27	1.21e-26
TAG55:2-FA18:2	3.03683	2.59e-26	1.49e-25
PC(17:0/20:5)	3.03791	5.16e-23	1.84e-22
TAG54:3-FA18:0	3.03812	2.1e-26	1.24e-25
TAG54:8-FA20:5	3.04018	1.59e-26	9.67e-26
TAG50:1-FA20:1	3.04155	9.52e-25	4.39e-24
TAG52:1-FA18:1	3.05668	4.01e-28	3.02e-27
TAG52:3-FA16:1	3.06065	2.09e-24	8.91e-24
TAG55:7-FA15:0	3.07581	7.33e-26	3.98e-25
TAG52:4-FA18:1	3.07643	3.56e-25	1.69e-24
TAG54:3-FA16:0	3.09809	2.55e-26	1.48e-25
TAG56:9-FA20:5	3.11119	1.21e-28	1.01e-27
TAG56:3-FA20:0	3.11981	3.1e-26	1.75e-25
PE(14:0/16:1)	3.12	9.87e-12	1.68e-11
TAG54:4-FA20:4	3.12495	1.52e-28	1.24e-27
PE(18:1/18:2)	3.13	6.6e-27	4.24e-26
TAG54:8-FA20:4	3.1372	7.4e-26	3.99e-25
TAG54:6-FA20:4	3.14454	1.04e-28	8.75e-28
TAG54:5-FA16:1	3.14841	1.21e-25	6.22e-25
TAG53:5-FA20:4	3.16956	4.26e-30	4.59e-29
PC(17:0/18:2)	3.17687	4.42e-28	3.29e-27
TAG54:2-FA18:1	3.19599	3.43e-28	2.67e-27
CE(20:4)	3.20818	4.93e-12	8.42e-12
PE(17:0/20:2)	3.21352	2.31e-15	4.84e-15
TAG53:1-FA17:0	3.21869	9.63e-30	9.86e-29
TAG54:3-FA18:1	3.2223	9.92e-28	7.1e-27
TAG54:4-FA18:2	3.22965	4.95e-28	3.66e-27
TAG56:5-FA20:1	3.25175	1.65e-26	9.99e-26
TAG56:9-FA20:4	3.26983	1.03e-29	1.03e-28
TAG53:2-FA17:0	3.27323	6.15e-30	6.43e-29
TAG58:10-FA18:2	3.27345	1.36e-29	1.35e-28
TAG53:2-FA18:1	3.28333	4.2e-30	4.59e-29
TAG50:4-FA16:1	3.30485	5.15e-24	2.07e-23
TAG57:3-FA18:2	3.31718	1.51e-29	1.47e-28
TAG52:3-FA14:0	3.32043	3.11e-25	1.48e-24
TAG54:1-FA18:1	3.33037	4.45e-30	4.73e-29
TAG55:4-FA18:1	3.3326	1.79e-30	2.02e-29
TAG52:6-FA20:4	3.34257	6.95e-29	6.02e-28
PC(17:0/18:1)	3.34462	4.15e-33	6.92e-32
TAG54:7-FA18:1	3.3464	4.06e-29	3.55e-28
TAG52:1-FA20:1	3.3466	3.15e-29	2.87e-28
PE(18:0/20:2)	3.3755	2.6e-29	2.46e-28
TAG52:4-FA20:2	3.38631	3.2e-26	1.79e-25
TAG54:4-FA20:1	3.38746	3.76e-28	2.86e-27
TAG54:5-FA20:2	3.39285	1.81e-27	1.23e-26
TAG53:6-FA20:4	3.41073	1.3e-31	1.66e-30
TAG54:5-FA18:2	3.42831	1.41e-28	1.16e-27
TAG53:1-FA18:1	3.4465	4.95e-32	6.68e-31
TAG56:4-FA20:4	3.44774	2.48e-31	3.05e-30
TAG56:6-FA18:2	3.45657	1.01e-30	1.18e-29
TAG52:3-FA20:2	3.47017	5.68e-28	4.11e-27
PE(16:0/16:1)	3.47023	1.72e-23	6.5e-23
TAG58:7-FA18:0	3.47291	2.92e-29	2.69e-28
PE(P-18:1/20:2)	3.47619	3.64e-28	2.8e-27
TAG52:4-FA16:1	3.48752	2.76e-27	1.86e-26
TAG54:6-FA16:1	3.4885	2.8e-29	2.62e-28
TAG58:9-FA18:2	3.48974	2.39e-29	2.29e-28
PC(17:0/20:3)	3.49818	1.95e-26	1.17e-25
TAG54:4-FA20:2	3.49828	9.71e-30	9.86e-29
TAG56:8-FA20:4	3.50576	1.41e-32	2.12e-31
PC(17:0/20:4)	3.52143	5.49e-26	3.03e-25
TAG54:1-FA20:1	3.52373	2.2e-30	2.45e-29
TAG56:6-FA18:0	3.53157	2.17e-32	3.17e-31
TAG58:8-FA22:6	3.54745	2.35e-25	1.18e-24
TAG58:6-FA18:0	3.55641	1.76e-28	1.41e-27
TAG58:6-FA20:4	3.56262	1.42e-32	2.12e-31
TAG56:8-FA16:1	3.56988	3.33e-29	2.99e-28
TAG58:8-FA20:3	3.58329	3.43e-32	4.71e-31
TAG50:2-FA20:2	3.604	2.85e-28	2.24e-27
TAG54:7-FA20:4	3.60409	6.98e-31	8.29e-30
TAG56:5-FA18:1	3.60824	3.43e-32	4.71e-31
TAG56:7-FA16:1	3.66642	3.06e-23	1.14e-22
PE(P-18:1/20:1)	3.66851	2.71e-22	8.98e-22
TAG54:3-FA20:2	3.68393	1.28e-31	1.66e-30
TAG54:4-FA22:1	3.69106	1.12e-20	3.36e-20
TAG56:6-FA20:5	3.69286	2.75e-34	5.85e-33
TAG56:6-FA22:5	3.70872	7.46e-20	2.14e-19
TAG56:6-FA20:3	3.71641	3.23e-33	5.52e-32
TAG53:3-FA17:0	3.71827	4.3e-33	7.01e-32
TAG54:7-FA16:1	3.75897	1.74e-31	2.18e-30
TAG56:2-FA20:1	3.81829	9.97e-34	1.84e-32
TAG57:2-FA18:1	3.83321	3.09e-35	7.34e-34
PC(18:1/20:2)	3.86478	7.11e-29	6.08e-28
TAG55:5-FA20:4	3.87045	4.94e-36	1.44e-34
TAG56:3-FA20:1	3.87459	5.96e-33	9.28e-32
TAG58:9-FA18:1	3.87487	6.1e-35	1.38e-33
PC(18:2/20:2)	3.91116	3.65e-07	5.07e-07
TAG56:1-FA18:1	3.949	9.11e-36	2.37e-34
TAG56:5-FA20:4	3.9691	6.6e-36	1.78e-34
TAG56:6-FA20:2	3.97016	3.66e-31	4.42e-30
TAG54:4-FA18:1	3.98217	1.75e-33	3.15e-32
TAG58:5-FA18:1	3.99806	8.85e-34	1.68e-32
TAG56:7-FA18:2	4.00626	2.22e-36	6.77e-35
PE(P-18:1/16:1)	4.0163	6.6e-26	3.61e-25
TAG56:3-FA18:0	4.01777	3.27e-34	6.56e-33
TAG52:2-FA20:2	4.02356	2.49e-33	4.36e-32
PE(18:1/20:2)	4.04142	7.06e-35	1.55e-33
TAG58:3-FA18:1	4.04995	3.79e-34	7.37e-33
TAG55:1-FA18:1	4.07205	1.94e-36	6.19e-35
TAG58:10-FA20:5	4.08385	5.63e-38	2.32e-36
TAG58:2-FA18:1	4.10786	3.14e-35	7.34e-34
TAG56:8-FA18:1	4.11575	5.13e-37	1.72e-35
PE(18:2/20:2)	4.11815	1.15e-21	3.64e-21
TAG56:6-FA18:1	4.13198	4.55e-37	1.68e-35
TAG56:7-FA20:5	4.16395	1.34e-37	5.22e-36
TAG58:7-FA22:5	4.21401	1.95e-28	1.55e-27
TAG56:6-FA22:4	4.2875	1.18e-25	6.13e-25
TAG54:4-FA16:1	4.29409	5.74e-33	9.15e-32
TAG54:2-FA20:2	4.30709	1.38e-35	3.46e-34
TAG58:6-FA18:1	4.38671	4.05e-38	1.77e-36
TAG56:5-FA18:2	4.39235	5.22e-36	1.46e-34
TAG56:6-FA20:4	4.40628	1.74e-39	1.36e-37
TAG56:4-FA20:1	4.43717	5.15e-37	1.72e-35
TAG58:8-FA18:1	4.45467	6.27e-39	3.38e-37
TAG58:8-FA20:4	4.4622	2.55e-39	1.62e-37
PC(12:0/20:2)	4.47	7.74e-07	1.06e-06
TAG58:7-FA18:2	4.51933	2.82e-32	4.03e-31
TAG58:7-FA18:1	4.52595	2.9e-38	1.35e-36
TAG56:7-FA18:1	4.54542	1.54e-39	1.35e-37
TAG56:8-FA18:2	4.56019	2.18e-39	1.53e-37
TAG58:9-FA20:4	4.6833	6.09e-42	1.07e-39
TAG56:3-FA20:2	4.71882	7.36e-39	3.69e-37
TAG56:8-FA20:5	4.72151	1.8e-41	2.53e-39
TAG58:8-FA18:2	4.76446	1.41e-30	1.62e-29
TAG56:4-FA20:2	4.77618	5.03e-39	2.94e-37
TAG56:4-FA18:1	4.84451	1.42e-39	1.35e-37
TAG58:10-FA20:4	4.89987	2.57e-43	6e-41
TAG58:6-FA22:4	4.93845	1.38e-27	9.78e-27
TAG56:5-FA20:2	4.99753	1.05e-39	1.23e-37
TAG56:7-FA20:4	5.04862	6.18e-44	2.17e-41
TAG58:7-FA20:4	5.30804	2.08e-44	1.46e-41
