# Supplementary material for: The lipidomes of C. elegans with mutations in asm-3/acid sphingomyelinase and hyl-2/ceramide synthase show distinct lipid profiles during aging
Source: Aging (Albany NY). 2023 Feb 13;15(3):650–74. doi: 10.18632/aging.204515 (PMC9970312; doi:10.18632/aging.204515)
Supplement: Supplementary Table 7 [file aging-15-204515-s008.xlsx]

## Sheet: Supplemental Table 7
Supplemental Table 7. Lipid changes between 10-day N2 and 10-day daf-16 animals
lipid	logFC	P.Value	FDR
DAG(18:1/18:1)	-7.66103	4.51e-08	6.57e-08
DAG(15:0/18:1)	-5.70075	1.83e-07	2.55e-07
DAG(16:1/18:1)	-5.44137	9.61e-08	1.36e-07
DAG(18:0/18:1)	-4.99804	8.74e-06	1.09e-05
DAG(18:1/18:2)	-4.91863	0.000454	0.000519
DAG(18:1/20:2)	-4.48977	2.56e-05	3.1e-05
DAG(16:0/18:1)	-4.16704	1.33e-05	1.65e-05
DAG(15:0/18:2)	-4.10626	1.77e-05	2.17e-05
DAG(18:1/20:1)	-3.84332	4.7e-06	5.94e-06
DAG(18:0/18:2)	-3.51063	0.000264	0.000304
DAG(14:0/18:1)	-3.20359	6.21e-05	7.35e-05
DAG(16:1/18:2)	-2.6216	0.00121	0.001364
DAG(16:1/18:0)	-2.33613	0.001259	0.001417
DAG(16:0/18:2)	-2.28023	0.004927	0.00544
DAG(16:0/16:1)	-2.13334	8.09e-05	9.55e-05
TAG58:7-FA22:5	2.00408	8.2e-12	1.82e-11
TAG44:1-FA14:0	2.00606	1.24e-10	2.36e-10
TAG50:0-FA16:0	2.01289	1.53e-17	1.08e-16
PC(14:0/18:1)	2.01417	1.34e-17	9.71e-17
PC(18:1/20:3)	2.01677	2.19e-16	1.1e-15
TAG50:5-FA20:5	2.02017	2.74e-16	1.31e-15
TAG54:0-FA18:0	2.02458	1.41e-16	7.35e-16
TAG52:4-FA20:4	2.02458	7.27e-18	5.66e-17
TAG58:8-FA20:3	2.02689	1.9e-17	1.3e-16
TAG54:7-FA20:4	2.02714	2.1e-16	1.07e-15
PC(16:0/18:1)	2.02836	1.44e-19	1.83e-18
TAG54:8-FA20:5	2.03223	8.62e-17	4.87e-16
TAG44:1-FA16:0	2.03274	3.35e-10	6.05e-10
TAG49:2-FA16:0	2.03353	7.99e-17	4.63e-16
TAG54:1-FA16:0	2.0389	2.72e-16	1.31e-15
PE(16:0/20:4)	2.04635	3.19e-16	1.48e-15
TAG49:1-FA16:0	2.04884	4.39e-18	3.58e-17
FFA(14:0)	2.05186	3.27e-19	3.68e-18
TAG52:6-FA18:1	2.0584	1.3e-16	6.92e-16
FFA(22:0)	2.0609	4.19e-17	2.6e-16
TAG54:5-FA16:1	2.06456	9.71e-16	4.25e-15
PE(P-18:0/20:4)	2.06501	4.77e-17	2.88e-16
TAG53:5-FA20:4	2.07363	4.44e-19	4.78e-18
TAG52:5-FA20:4	2.0774	1.17e-17	8.74e-17
PC(18:1/20:4)	2.0774	1.06e-17	8.15e-17
TAG48:2-FA16:1	2.08199	1.46e-14	4.96e-14
TAG56:6-FA18:1	2.08466	1.99e-18	1.79e-17
TAG54:6-FA18:1	2.08663	1.25e-17	9.22e-17
TAG52:5-FA16:1	2.08677	1.05e-15	4.53e-15
TAG52:5-FA20:5	2.09137	2.31e-18	2.02e-17
TAG52:1-FA16:1	2.09404	2.2e-16	1.1e-15
TAG55:5-FA20:4	2.09417	2.98e-19	3.49e-18
FFA(16:0)	2.10066	2.04e-17	1.37e-16
TAG50:3-FA16:0	2.10192	1.07e-15	4.58e-15
TAG53:1-FA16:0	2.1052	1.96e-18	1.78e-17
TAG53:4-FA20:4	2.10749	9.31e-19	9.06e-18
PC(16:0/18:0)	2.10773	1.14e-17	8.62e-17
TAG50:2-FA18:0	2.10968	6.06e-16	2.72e-15
TAG48:1-FA16:0	2.1106	3.92e-16	1.81e-15
TAG50:5-FA20:4	2.11064	1.13e-15	4.75e-15
TAG50:2-FA16:1	2.11137	2.94e-16	1.38e-15
TAG55:1-FA16:0	2.11505	2.84e-18	2.43e-17
TAG44:0-FA16:0	2.12085	1.98e-05	2.41e-05
PC(18:0/20:3)	2.12259	1.66e-16	8.57e-16
TAG45:1-FA16:0	2.12553	1.05e-16	5.82e-16
TAG49:2-FA16:1	2.12565	8.4e-17	4.83e-16
TAG56:5-FA18:0	2.12565	2.15e-18	1.9e-17
TAG54:5-FA18:0	2.13361	3.87e-18	3.27e-17
TAG49:1-FA16:1	2.13791	3.65e-17	2.29e-16
TAG48:2-FA18:0	2.14029	4.49e-15	1.66e-14
TAG56:7-FA18:1	2.14345	1.18e-18	1.13e-17
TAG52:2-FA16:1	2.14409	1.3e-16	6.92e-16
TAG49:0-FA16:0	2.15097	7.53e-19	7.54e-18
TAG54:4-FA20:4	2.15192	5.21e-19	5.45e-18
TAG44:1-FA16:1	2.16144	1.53e-11	3.21e-11
TAG52:3-FA16:1	2.16643	2.45e-16	1.21e-15
TAG54:7-FA18:1	2.16705	4.29e-18	3.54e-17
TAG51:4-FA20:4	2.1739	3.11e-19	3.57e-18
TAG48:3-FA16:0	2.17504	3.12e-12	7.3e-12
TAG58:6-FA20:4	2.18144	1.73e-19	2.17e-18
TAG58:8-FA20:4	2.18146	2.58e-19	3.06e-18
TAG54:0-FA16:0	2.18588	1.55e-15	6.43e-15
TAG54:6-FA16:1	2.18624	1.66e-17	1.15e-16
PC(16:0/20:3)	2.18703	1.49e-17	1.06e-16
TAG52:2-FA16:0	2.19377	1.94e-18	1.78e-17
TAG49:3-FA16:1	2.19577	6.12e-17	3.61e-16
TAG52:6-FA20:5	2.19604	8.13e-19	8.02e-18
PC(16:0/16:0)	2.19735	7.09e-08	1.02e-07
TAG47:0-FA16:0	2.20458	1.34e-17	9.71e-17
PC(12:0/20:2)	2.20982	0.009405	0.01027
PE(18:0/18:4)	2.21375	3.26e-07	4.45e-07
TAG54:8-FA20:4	2.21503	2.01e-17	1.37e-16
PE(18:1/18:4)	2.21552	1.3e-06	1.71e-06
TAG46:2-FA14:0	2.21991	2.58e-14	8.37e-14
PC(18:0/20:4)	2.22165	3.87e-19	4.24e-18
TAG56:8-FA16:0	2.22653	1.36e-19	1.77e-18
TAG56:7-FA20:5	2.23025	3.57e-20	5.33e-19
PC(17:0/14:1)	2.23531	2.58e-16	1.26e-15
TAG44:2-FA16:1	2.23704	2.02e-14	6.72e-14
TAG56:6-FA20:4	2.24117	2.36e-20	3.68e-19
TAG50:1-FA16:0	2.24376	7.26e-20	1.04e-18
TAG54:5-FA16:0	2.2464	1.35e-19	1.77e-18
TAG54:6-FA20:4	2.24677	5.43e-20	7.93e-19
TAG54:5-FA20:5	2.24783	2.14e-20	3.42e-19
TAG52:0-FA16:0	2.25154	7.01e-19	7.12e-18
PC(16:0/20:4)	2.25222	8.32e-20	1.17e-18
TAG50:4-FA16:1	2.25575	2.59e-15	1.01e-14
TAG56:1-FA16:0	2.25918	1.14e-17	8.62e-17
TAG52:1-FA16:0	2.2626	1.97e-19	2.38e-18
PC(14:0/20:3)	2.26503	4.84e-17	2.9e-16
PC(14:0/16:1)	2.26529	6.72e-07	9.04e-07
TAG52:6-FA20:4	2.26618	6.26e-19	6.46e-18
TAG50:3-FA16:1	2.26704	2.1e-17	1.39e-16
TAG47:1-FA16:0	2.27645	4.26e-18	3.54e-17
SM(18:0)	2.27681	5.73e-08	8.29e-08
TAG50:2-FA16:0	2.29114	4.68e-19	4.97e-18
TAG44:2-FA14:0	2.29427	4.65e-06	5.89e-06
TAG56:6-FA18:0	2.29748	9.24e-21	1.54e-19
PE(14:0/20:4)	2.33232	9.22e-10	1.58e-09
TAG48:4-FA16:1	2.33476	1.03e-09	1.75e-09
TAG54:7-FA20:5	2.33841	6.1e-21	1.07e-19
TAG50:4-FA16:0	2.34032	4.22e-17	2.6e-16
TAG58:10-FA20:5	2.34075	4.29e-22	1.04e-20
TAG47:1-FA16:1	2.3409	1.62e-17	1.13e-16
TAG54:5-FA20:4	2.34702	2.23e-21	4.59e-20
TAG56:4-FA20:4	2.34865	5.22e-21	9.38e-20
CE(18:2)	2.35594	1.36e-09	2.27e-09
TAG54:6-FA16:0	2.35627	4.86e-21	9.01e-20
TAG54:7-FA16:1	2.35831	3.31e-19	3.68e-18
PC(14:0/20:4)	2.35997	2.54e-17	1.66e-16
PC(18:1/16:1)	2.36069	1.66e-21	3.63e-20
LPE(20:2)	2.36421	8.81e-17	4.94e-16
TAG52:7-FA20:5	2.37108	1.05e-19	1.42e-18
TAG56:5-FA20:4	2.38132	1.36e-21	3.17e-20
TAG58:9-FA20:4	2.39107	2.76e-22	8.35e-21
TAG52:5-FA16:0	2.3923	3.22e-22	8.35e-21
TAG58:10-FA20:4	2.39262	3.2e-22	8.35e-21
PC(12:0/18:2)	2.40441	2.06e-17	1.38e-16
LPC(18:2)	2.41025	2.68e-13	7.52e-13
TAG56:9-FA20:4	2.41077	1.41e-21	3.19e-20
TAG46:1-FA16:0	2.42054	4.66e-16	2.11e-15
TAG54:6-FA20:5	2.42068	2.91e-22	8.35e-21
TAG56:6-FA20:5	2.43204	1.35e-22	5.89e-21
PC(18:0/12:0)	2.44012	3.48e-13	9.48e-13
TAG47:2-FA16:1	2.44181	1.53e-18	1.45e-17
FFA(17:0)	2.47938	1.84e-22	6.8e-21
PC(16:0/16:1)	2.4979	2.82e-22	8.35e-21
TAG46:2-FA16:1	2.50837	2.57e-16	1.26e-15
PC(18:0/16:1)	2.51158	3.17e-22	8.35e-21
FFA(24:0)	2.52086	3.87e-24	2.71e-22
PC(12:0/20:5)	2.54633	1.56e-10	2.92e-10
FFA(15:0)	2.55158	2.86e-25	2.5e-23
CE(18:1)	2.55383	4.6e-17	2.81e-16
TAG50:6-FA20:4	2.55966	1.81e-13	5.3e-13
SM(16:0)	2.56207	5.51e-23	2.76e-21
LPC(20:2)	2.60259	4.85e-18	3.86e-17
TAG52:6-FA16:0	2.60504	1.8e-21	3.83e-20
LPE(15:0)	2.60835	1.89e-14	6.3e-14
TAG46:2-FA16:0	2.61733	1.89e-19	2.32e-18
TAG50:5-FA16:1	2.66529	5.51e-13	1.46e-12
TAG48:2-FA16:0	2.6793	1.58e-20	2.57e-19
FFA(18:0)	2.68932	2.9e-22	8.35e-21
TAG52:6-FA16:1	2.70665	3.59e-23	2.1e-21
PC(12:0/18:3)	2.71807	1.61e-09	2.66e-09
CE(20:5)	2.71896	3.92e-22	9.81e-21
PC(16:0/12:0)	2.72937	7.07e-18	5.57e-17
PC(14:0/18:3)	2.73856	8.12e-07	1.09e-06
CE(20:4)	2.74298	9.49e-10	1.62e-09
TAG46:3-FA16:1	2.75843	1.75e-22	6.8e-21
TAG48:3-FA16:1	2.77564	2.71e-21	5.36e-20
PC(12:0/18:1)	2.83326	2.7e-20	4.11e-19
LPC(18:3)	2.934	1.67e-07	2.34e-07
LPC(15:0)	2.95383	6.51e-16	2.91e-15
LPE(18:2)	2.95551	3.4e-14	1.08e-13
PC(12:0/20:3)	2.96503	4.89e-21	9.01e-20
PC(12:0/20:4)	3.00729	2.75e-21	5.36e-20
LPC(20:5)	3.04232	4.68e-18	3.77e-17
PC(12:0/16:1)	3.10537	8.7e-07	1.16e-06
LPE(20:5)	3.10601	8.6e-11	1.65e-10
LPE(20:4)	3.14125	1.79e-16	9.18e-16
LPE(20:3)	3.16095	8.51e-21	1.45e-19
LPE(18:1)	3.16498	9.46e-23	4.42e-21
LPC(17:0)	3.19396	6.83e-24	4.35e-22
LPE(16:1)	3.22464	1.47e-22	6.07e-21
PC(12:0/20:1)	3.26206	4.38e-06	5.55e-06
LPE(17:0)	3.31381	1.02e-19	1.4e-18
LPC(20:4)	3.35834	4.5e-23	2.43e-21
LPC(20:3)	3.39546	2.18e-24	1.7e-22
LPC(16:1)	3.40621	3.91e-11	7.76e-11
LPE(16:0)	3.41182	9.81e-29	3.44e-26
LPE(20:1)	3.47818	2.19e-28	5.11e-26
LPC(18:1)	3.48054	1.31e-26	1.32e-24
LPC(20:1)	3.52364	2.58e-22	8.35e-21
LPE(18:0)	3.55036	6.42e-29	3.44e-26
LPE(20:0)	3.57359	6.57e-28	9.29e-26
LPC(18:0)	3.63929	6.63e-28	9.29e-26
LPC(16:0)	3.66888	1.03e-26	1.2e-24
LPC(20:0)	4.1642	1.2e-07	1.68e-07
