# Supplementary material for: The lipidomes of C. elegans with mutations in asm-3/acid sphingomyelinase and hyl-2/ceramide synthase show distinct lipid profiles during aging
Source: Aging (Albany NY). 2023 Feb 13;15(3):650–74. doi: 10.18632/aging.204515 (PMC9970312; doi:10.18632/aging.204515)
Supplement: Supplementary Table 8 [file aging-15-204515-s009.xlsx]

## Sheet: Supplemental Table 8
Supplemental Table 8. Comparative Lipid Changes Between 10- and 1-day asm-3 animals vs 10- and 1-day N2 animals
lipid	logFC	P.Value	FDR
PC(12:0/20:2)	-8.40973	4.33e-10	5.73e-10
PC(18:2/18:3)	-6.05227	2.14e-10	2.87e-10
PC(12:0/20:1)	-5.76982	2.85e-08	3.51e-08
TAG46:3-FA14:0	-5.66458	9.67e-18	2.71e-17
PE(15:0/20:2)	-5.57268	6.91e-09	8.66e-09
PC(12:0/16:1)	-5.56011	2.26e-09	2.92e-09
TAG48:4-FA14:1	-5.48137	6.41e-28	1.5e-25
TAG44:2-FA12:0	-5.41539	8.95e-13	1.36e-12
TAG46:3-FA14:1	-5.28601	2.3e-31	1.61e-28
PE(14:0/18:2)	-5.12351	2.03e-21	1.37e-20
PC(16:0/18:3)	-5.06036	7.28e-13	1.11e-12
TAG50:4-FA14:1	-5.01185	2.37e-27	2.38e-25
TAG52:2-FA20:2	-5.00979	1.41e-29	4.94e-27
TAG50:2-FA20:2	-4.9556	1.74e-27	2.38e-25
PC(14:0/18:3)	-4.95488	1.51e-09	1.95e-09
TAG44:1-FA14:1	-4.9383	3.28e-14	5.57e-14
PC(18:2/20:2)	-4.82225	6.18e-06	7.19e-06
PC(12:0/18:3)	-4.79245	9.26e-13	1.41e-12
TAG48:4-FA16:1	-4.79163	7.51e-16	1.59e-15
TAG42:0-FA14:0	-4.72768	7.74e-06	8.97e-06
TAG52:3-FA20:2	-4.72137	6.72e-27	5.89e-25
TAG52:4-FA20:2	-4.70505	9.6e-26	4.81e-24
TAG42:1-FA14:0	-4.69414	5.91e-09	7.49e-09
DAG(16:1/18:2)	-4.68383	6.06e-05	6.9e-05
TAG44:2-FA14:0	-4.67781	4.99e-10	6.59e-10
PE(18:2/20:2)	-4.66398	1.17e-16	2.73e-16
LCER(18:0)	-4.66209	8.45e-08	1.02e-07
PE(P-18:1/18:3)	-4.64552	4.34e-12	6.37e-12
TAG54:2-FA20:2	-4.63505	1.54e-27	2.38e-25
TAG50:4-FA18:2	-4.63234	8.14e-26	4.48e-24
LPC(18:3)	-4.61457	1.12e-08	1.39e-08
DAG(18:1/20:2)	-4.57813	0.00181	0.001967
TAG56:5-FA20:2	-4.55121	1.54e-26	1.2e-24
DAG(15:0/18:2)	-4.5407	0.000595	0.000658
TAG46:2-FA18:2	-4.53856	2.93e-16	6.46e-16
TAG48:1-FA14:1	-4.52888	2.28e-27	2.38e-25
LPC(16:1)	-4.51029	3.36e-10	4.49e-10
TAG49:3-FA18:2	-4.49927	7.76e-26	4.48e-24
TAG52:3-FA14:0	-4.48917	4.73e-24	8.29e-23
TAG46:1-FA14:1	-4.46969	2.39e-25	9.31e-24
TAG54:4-FA16:1	-4.42854	4.36e-24	8.04e-23
TAG46:3-FA16:1	-4.40253	1.28e-25	6e-24
TAG48:3-FA18:2	-4.39687	4.02e-23	4.54e-22
TAG48:4-FA18:2	-4.38952	1.76e-25	7.73e-24
TAG51:4-FA18:2	-4.36524	2.13e-26	1.5e-24
TAG44:0-FA12:0	-4.36048	1.68e-10	2.26e-10
PE(P-18:1/20:2)	-4.33836	9.24e-25	2.59e-23
TAG47:2-FA18:2	-4.32904	2.02e-24	4.43e-23
TAG44:1-FA16:1	-4.29621	6.9e-18	2.01e-17
TAG50:4-FA16:1	-4.29346	7.18e-22	5.78e-21
TAG48:2-FA18:2	-4.29216	1.96e-24	4.43e-23
TAG50:5-FA18:2	-4.28784	1.18e-13	1.91e-13
TAG46:3-FA18:2	-4.28663	8.86e-22	6.75e-21
PE(P-18:1/20:1)	-4.28251	7.94e-18	2.27e-17
TAG56:5-FA18:2	-4.26978	3.8e-25	1.21e-23
PC(14:0/16:1)	-4.26774	3.27e-10	4.37e-10
TAG58:8-FA18:2	-4.26355	1.06e-18	3.6e-18
TAG48:3-FA14:0	-4.26115	2.66e-21	1.68e-20
TAG46:2-FA14:1	-4.25519	8.53e-25	2.49e-23
TAG46:2-FA14:0	-4.25314	9.34e-21	5e-20
TAG54:3-FA20:2	-4.24243	8.3e-26	4.48e-24
TAG50:2-FA18:2	-4.23821	2.09e-25	8.61e-24
TAG56:3-FA20:2	-4.21063	2.81e-25	1.02e-23
PE(O-16:0/20:2)	-4.19828	1.88e-14	3.27e-14
TAG56:4-FA20:2	-4.18173	6.52e-25	1.99e-23
TAG51:4-FA16:1	-4.16487	3.67e-24	7.15e-23
TAG56:6-FA20:2	-4.15468	6.61e-23	7.02e-22
TAG48:4-FA18:3	-4.14155	9.86e-13	1.49e-12
PE(P-18:1/16:1)	-4.12477	4.53e-18	1.39e-17
TAG58:7-FA18:2	-4.11031	2.13e-20	1.02e-19
TAG50:3-FA18:2	-4.09459	1.2e-23	1.53e-22
TAG50:3-FA14:1	-4.0788	5.08e-24	8.48e-23
TAG49:2-FA18:2	-4.07764	7.74e-24	1.13e-22
TAG52:4-FA16:1	-4.0648	3.34e-22	2.93e-21
TAG50:1-FA20:1	-4.05952	3.01e-23	3.45e-22
TAG47:2-FA14:0	-4.05591	7.41e-22	5.83e-21
PC(15:0/16:1)	-4.05359	3.86e-10	5.13e-10
TAG48:3-FA16:1	-4.04468	5.03e-22	4.35e-21
TAG46:2-FA16:1	-4.04233	3.96e-19	1.51e-18
TAG46:1-FA16:1	-4.02731	2.65e-21	1.68e-20
TAG47:0-FA17:0	-4.02476	1.95e-24	4.43e-23
TAG50:5-FA18:3	-4.02202	1.01e-21	7.46e-21
TAG56:6-FA22:5	-4.02107	2.63e-14	4.53e-14
TAG48:1-FA16:1	-4.01732	1.52e-22	1.44e-21
TAG52:1-FA20:1	-4.01406	1.06e-24	2.85e-23
TAG51:5-FA18:2	-4.00394	9.32e-24	1.31e-22
TAG47:2-FA16:1	-4.00267	5.25e-22	4.48e-21
PE(18:1/20:2)	-3.99378	1.3e-24	3.25e-23
TAG53:3-FA17:0	-3.99335	2.91e-25	1.02e-23
TAG54:5-FA20:2	-3.98992	1.37e-22	1.31e-21
TAG48:2-FA14:1	-3.97197	7.03e-24	1.05e-22
TAG44:1-FA14:0	-3.97016	1.61e-16	3.65e-16
TAG54:4-FA20:2	-3.96933	1.01e-23	1.35e-22
LPC(15:0)	-3.9689	6.38e-15	1.17e-14
PE(16:0/20:2)	-3.96752	4.47e-23	4.98e-22
TAG48:4-FA14:0	-3.96259	3.47e-18	1.09e-17
TAG49:0-FA17:0	-3.96107	3.62e-25	1.21e-23
TAG52:2-FA18:2	-3.94247	1.21e-24	3.14e-23
TAG54:5-FA18:2	-3.94092	5.15e-23	5.64e-22
TAG45:0-FA15:0	-3.92729	1.6e-24	3.88e-23
TAG50:3-FA14:0	-3.91681	5.66e-20	2.54e-19
TAG44:1-FA18:1	-3.91344	6.3e-17	1.53e-16
PE(17:0/20:2)	-3.90724	1.15e-12	1.73e-12
TAG49:3-FA15:0	-3.89557	8.95e-24	1.28e-22
TAG47:0-FA15:0	-3.89506	5.03e-24	8.48e-23
TAG52:5-FA18:2	-3.89349	1.09e-21	7.99e-21
TAG51:3-FA15:0	-3.8907	4.18e-24	7.92e-23
TAG49:2-FA17:0	-3.88819	1.87e-23	2.3e-22
PE(O-18:0/20:2)	-3.88426	3.06e-24	6.5e-23
TAG44:0-FA16:0	-3.88085	9.58e-08	1.16e-07
TAG44:2-FA16:1	-3.87355	1.48e-18	4.87e-18
TAG56:4-FA18:1	-3.86775	5.72e-23	6.17e-22
TAG51:3-FA18:2	-3.86563	3.4e-24	7e-23
DAG(18:1/18:2)	-3.85446	0.045653	0.046994
PE(O-18:0/14:1)	-3.84885	2.74e-11	3.86e-11
TAG53:4-FA17:0	-3.84748	3.53e-24	7.07e-23
TAG47:1-FA16:1	-3.84334	6.66e-21	3.73e-20
DAG(16:1/16:1)	-3.83725	2e-05	2.29e-05
TAG47:1-FA17:0	-3.83685	2.52e-21	1.64e-20
TAG50:4-FA14:0	-3.83419	1.99e-19	8.17e-19
TAG55:5-FA18:2	-3.83418	6.01e-24	9.57e-23
DAG(16:0/18:2)	-3.83106	0.000946	0.001039
TAG44:0-FA14:0	-3.83029	3.62e-18	1.13e-17
TAG56:6-FA18:3	-3.82818	9.58e-24	1.32e-22
PC(15:0/18:2)	-3.82731	4.48e-24	8.05e-23
TAG50:2-FA14:1	-3.81328	6.96e-23	7.29e-22
TAG50:4-FA18:1	-3.79681	1.14e-21	8.15e-21
TAG51:5-FA18:3	-3.79446	2.65e-23	3.09e-22
TAG49:3-FA16:1	-3.79084	1.87e-21	1.27e-20
TAG52:8-FA18:2	-3.78898	2.38e-22	2.14e-21
LCER(20:1)	-3.78347	5.7e-06	6.64e-06
TAG50:5-FA16:1	-3.77851	5e-13	7.7e-13
TAG45:1-FA15:0	-3.77505	3.7e-21	2.25e-20
TAG46:1-FA14:0	-3.76638	1.07e-17	2.98e-17
PE(P-18:0/20:2)	-3.76444	1.02e-23	1.35e-22
TAG52:5-FA16:1	-3.76358	4.77e-21	2.81e-20
TAG51:3-FA17:0	-3.76304	1.23e-23	1.54e-22
TAG46:1-FA18:1	-3.76073	6.29e-18	1.85e-17
TAG58:5-FA18:1	-3.75808	2.07e-22	1.88e-21
TAG56:4-FA20:1	-3.7578	2.01e-22	1.85e-21
TAG53:3-FA18:2	-3.75551	7.04e-24	1.05e-22
TAG56:5-FA20:1	-3.75317	2.86e-21	1.76e-20
TAG48:3-FA12:0	-3.75033	1.54e-17	4.17e-17
TAG51:2-FA18:2	-3.74774	2.1e-23	2.54e-22
TAG53:2-FA18:2	-3.74397	6.84e-24	1.05e-22
PE(16:0/18:3)	-3.73938	7.16e-05	8.14e-05
TAG54:4-FA20:1	-3.73415	1.35e-21	9.48e-21
TAG51:4-FA15:0	-3.7338	9.66e-23	9.62e-22
TAG50:1-FA16:1	-3.73113	8.98e-22	6.77e-21
TAG49:0-FA15:0	-3.72992	5.71e-24	9.31e-23
TAG51:0-FA17:0	-3.72607	1.05e-23	1.36e-22
PC(18:1/20:2)	-3.72302	5e-19	1.83e-18
TAG46:0-FA14:0	-3.71474	2.25e-18	7.2e-18
PE(16:0/18:2)	-3.71441	9.55e-22	7.12e-21
TAG44:1-FA12:0	-3.71426	4.33e-16	9.43e-16
TAG49:2-FA16:1	-3.71127	1.44e-21	9.98e-21
TAG49:1-FA17:0	-3.69639	2.54e-23	3.02e-22
TAG48:0-FA14:0	-3.68575	1.11e-19	4.84e-19
TAG54:6-FA22:5	-3.68335	1.21e-14	2.15e-14
PC(17:0/18:2)	-3.67012	1.07e-22	1.05e-21
TAG52:4-FA18:2	-3.669	8.06e-22	6.28e-21
TAG47:2-FA18:1	-3.66808	2.63e-21	1.68e-20
TAG44:3-FA18:2	-3.66711	6.66e-08	8.14e-08
TAG54:6-FA18:2	-3.66636	1.62e-21	1.11e-20
TAG50:3-FA18:3	-3.66459	5.66e-22	4.78e-21
TAG47:2-FA15:0	-3.65896	6.92e-22	5.64e-21
TAG48:2-FA16:1	-3.65405	4.97e-19	1.83e-18
TAG47:1-FA15:0	-3.63922	6.57e-22	5.48e-21
PE(O-18:0/18:2)	-3.62955	9.73e-23	9.62e-22
TAG48:3-FA18:3	-3.62948	1.79e-14	3.14e-14
PE(14:0/16:1)	-3.61642	6.14e-09	7.77e-09
TAG52:3-FA18:2	-3.61578	1.72e-22	1.61e-21
TAG54:3-FA16:0	-3.61365	2.34e-21	1.53e-20
DAG(16:1/18:1)	-3.60422	0.007162	0.007607
TAG58:9-FA18:2	-3.59171	5.89e-21	3.43e-20
TAG52:4-FA14:0	-3.58646	9.9e-19	3.4e-18
TAG50:3-FA18:1	-3.58437	3.31e-20	1.55e-19
TAG52:6-FA18:2	-3.58335	3.01e-19	1.15e-18
TAG52:6-FA18:3	-3.58025	9.77e-19	3.37e-18
TAG48:3-FA16:0	-3.57932	6.44e-15	1.18e-14
TAG49:3-FA18:3	-3.57709	2.7e-19	1.06e-18
TAG48:2-FA18:1	-3.5749	6.25e-18	1.84e-17
TAG49:1-FA16:1	-3.56849	6.72e-21	3.74e-20
TAG53:4-FA18:2	-3.56848	8.46e-23	8.73e-22
TAG56:3-FA18:2	-3.56833	5.98e-21	3.43e-20
TAG52:3-FA20:1	-3.56833	4.78e-20	2.16e-19
TAG48:3-FA18:1	-3.56508	2.07e-20	9.99e-20
TAG48:2-FA16:0	-3.56156	4.29e-19	1.61e-18
TAG56:3-FA18:0	-3.55528	2.82e-21	1.75e-20
TAG50:4-FA18:3	-3.55228	2.26e-19	9.07e-19
TAG56:4-FA18:2	-3.53872	2.11e-21	1.41e-20
PE(17:0/18:3)	-3.53797	2.24e-17	5.81e-17
TAG51:2-FA16:1	-3.53662	5.93e-21	3.43e-20
TAG55:2-FA18:2	-3.53402	2.7e-21	1.69e-20
TAG47:1-FA14:0	-3.5334	9.66e-19	3.35e-18
TAG56:7-FA22:5	-3.5225	4.55e-18	1.39e-17
TAG45:0-FA14:0	-3.51691	6.61e-16	1.42e-15
PE(P-18:1/18:2)	-3.51089	1.1e-20	5.84e-20
TAG58:7-FA22:5	-3.51039	1.27e-15	2.55e-15
TAG54:7-FA22:6	-3.49967	2.71e-07	3.26e-07
TAG42:1-FA18:1	-3.49664	5.48e-16	1.18e-15
PE(O-16:0/20:1)	-3.49105	2.43e-11	3.44e-11
TAG52:8-FA16:1	-3.48706	4.32e-21	2.57e-20
PE(16:0/16:1)	-3.4863	1.07e-15	2.18e-15
PE(O-18:0/18:3)	-3.485	0.021812	0.022821
TAG49:2-FA18:1	-3.47342	1.84e-20	9.04e-20
TAG52:2-FA20:1	-3.472	1.31e-19	5.54e-19
TAG56:7-FA16:1	-3.46947	2.31e-14	4e-14
TAG54:1-FA20:1	-3.45683	1.15e-20	6.04e-20
TAG52:3-FA18:3	-3.45666	4.03e-20	1.86e-19
TAG49:1-FA14:0	-3.45128	6.21e-19	2.24e-18
TAG52:3-FA20:3	-3.44663	1.4e-20	7.07e-20
TAG48:1-FA18:1	-3.43592	1.97e-19	8.12e-19
LCER(18:1)	-3.43289	5.42e-11	7.47e-11
DAG(15:0/18:1)	-3.43248	0.016762	0.01759
TAG49:2-FA16:0	-3.42953	9.29e-21	5e-20
TAG54:2-FA18:2	-3.42874	4.57e-20	2.08e-19
TAG48:3-FA14:1	-3.42158	1.51e-20	7.54e-20
TAG49:2-FA14:0	-3.41646	6.26e-19	2.25e-18
TAG52:2-FA14:0	-3.41102	1.58e-17	4.26e-17
LPC(16:0)	-3.41096	1.38e-16	3.17e-16
TAG54:5-FA16:1	-3.40896	4.99e-19	1.83e-18
TAG47:1-FA18:1	-3.40748	1.19e-18	3.99e-18
PC(17:0/16:1)	-3.40556	3.55e-17	8.99e-17
TAG51:1-FA17:0	-3.40021	2.57e-22	2.28e-21
TAG46:2-FA16:0	-3.39628	1.53e-17	4.15e-17
TAG51:4-FA18:3	-3.39479	6.79e-22	5.6e-21
TAG50:2-FA16:1	-3.39109	5.49e-19	1.99e-18
TAG54:3-FA18:2	-3.38981	7.17e-21	3.96e-20
TAG54:6-FA18:3	-3.38271	1.2e-19	5.17e-19
DAG(14:0/18:1)	-3.38247	0.002219	0.002401
TAG49:1-FA15:0	-3.38138	8.66e-22	6.67e-21
TAG51:3-FA16:1	-3.38054	2.79e-19	1.08e-18
TAG50:3-FA18:0	-3.37941	4.05e-17	1.01e-16
TAG50:3-FA20:3	-3.37569	2.47e-20	1.17e-19
TAG48:1-FA14:0	-3.37406	2.06e-17	5.39e-17
PC(17:0/20:5)	-3.37142	2.34e-17	6.04e-17
LPC(17:0)	-3.37044	5.1e-17	1.25e-16
TAG55:4-FA18:2	-3.36532	6.13e-21	3.49e-20
PE(18:2/18:3)	-3.36295	3.07e-06	3.6e-06
TAG55:4-FA18:1	-3.35975	2.13e-21	1.41e-20
PE(O-16:0/16:1)	-3.35849	1.51e-17	4.13e-17
TAG46:1-FA16:0	-3.35782	1.13e-15	2.3e-15
TAG54:4-FA18:2	-3.35644	4.38e-20	2.01e-19
PE(O-16:0/18:2)	-3.35145	4.6e-18	1.39e-17
TAG50:1-FA18:1	-3.34997	1.33e-20	6.83e-20
TAG47:0-FA14:0	-3.3474	5.45e-18	1.62e-17
TAG57:3-FA18:2	-3.34514	1.24e-20	6.47e-20
PE(18:2/16:1)	-3.34301	7.32e-21	4.01e-20
PC(18:1/18:3)	-3.33982	1.11e-21	7.99e-21
TAG54:8-FA18:2	-3.33916	4.18e-19	1.58e-18
PE(17:0/18:2)	-3.33526	4.06e-07	4.87e-07
TAG53:4-FA18:3	-3.33467	1.4e-20	7.07e-20
TAG55:3-FA18:2	-3.33113	1.27e-20	6.58e-20
TAG54:4-FA18:1	-3.3303	2.21e-19	8.91e-19
TAG54:3-FA16:1	-3.32958	8.93e-19	3.13e-18
TAG51:3-FA18:3	-3.3293	1.9e-20	9.26e-20
PE(18:0/20:2)	-3.3187	7.6e-20	3.35e-19
TAG56:10-FA18:2	-3.31666	6.7e-20	2.97e-19
TAG44:2-FA18:1	-3.31589	3.15e-14	5.36e-14
TAG58:10-FA18:2	-3.31579	8.89e-21	4.83e-20
TAG47:1-FA16:0	-3.31495	9.61e-19	3.35e-18
LPC(20:2)	-3.30612	8.4e-16	1.76e-15
TAG50:3-FA16:0	-3.30256	6.96e-18	2.02e-17
PE(17:0/20:5)	-3.29902	8.63e-07	1.02e-06
TAG46:2-FA18:1	-3.29599	2.5e-16	5.55e-16
TAG53:2-FA17:0	-3.29591	6.37e-21	3.6e-20
TAG58:6-FA18:1	-3.29546	2.3e-20	1.09e-19
TAG50:2-FA18:0	-3.29419	5.13e-18	1.54e-17
TAG52:4-FA18:1	-3.29256	2.24e-18	7.2e-18
TAG52:0-FA20:0	-3.28853	4.01e-18	1.23e-17
PE(O-18:0/16:1)	-3.28184	9.74e-23	9.62e-22
TAG49:3-FA16:0	-3.28006	6.92e-19	2.46e-18
PE(16:0/14:0)	-3.27924	2.61e-13	4.08e-13
LPC(18:2)	-3.27895	1.23e-12	1.85e-12
TAG58:3-FA18:1	-3.26241	4.99e-19	1.83e-18
TAG54:2-FA20:1	-3.2569	2.17e-19	8.79e-19
PC(18:1/18:2)	-3.25291	1.34e-19	5.67e-19
TAG56:3-FA20:0	-3.24963	1.19e-18	4e-18
TAG56:6-FA20:3	-3.24595	3.49e-20	1.63e-19
PC(15:0/20:5)	-3.2431	1.15e-16	2.72e-16
PE(P-18:1/18:1)	-3.23961	7.4e-22	5.83e-21
PC(16:0/18:2)	-3.23821	2.04e-19	8.33e-19
TAG54:4-FA22:1	-3.2314	2.74e-11	3.86e-11
TAG45:1-FA16:0	-3.22381	3.4e-18	1.07e-17
TAG56:6-FA18:2	-3.22049	9.93e-20	4.35e-19
PE(17:0/22:5)	-3.22014	6.52e-14	1.09e-13
TAG56:8-FA16:1	-3.21257	8.87e-18	2.52e-17
PC(18:2/18:2)	-3.2099	1.6e-20	7.94e-20
TAG58:7-FA18:1	-3.2069	4.04e-19	1.53e-18
TAG50:2-FA18:1	-3.20642	4.73e-18	1.42e-17
TAG53:1-FA17:0	-3.20178	1.8e-20	8.87e-20
TAG50:4-FA20:3	-3.1994	4.99e-09	6.36e-09
TAG48:0-FA18:0	-3.19726	6.13e-17	1.5e-16
TAG54:5-FA18:1	-3.19509	5.11e-19	1.86e-18
PE(18:1/18:2)	-3.1815	1.18e-18	3.99e-18
TAG52:3-FA16:1	-3.1807	4.1e-17	1.02e-16
TAG52:2-FA16:1	-3.18002	1.29e-17	3.57e-17
PE(14:0/18:1)	-3.17782	4.88e-17	1.21e-16
TAG55:7-FA15:0	-3.17575	3.77e-18	1.16e-17
TAG54:3-FA20:3	-3.17556	1.84e-19	7.67e-19
TAG58:6-FA22:4	-3.17468	1.16e-10	1.57e-10
TAG52:4-FA18:3	-3.17391	1.17e-19	5.08e-19
TAG46:0-FA12:0	-3.16653	3.66e-05	4.19e-05
LPE(20:2)	-3.16354	1.17e-15	2.36e-15
TAG48:2-FA14:0	-3.16025	7.4e-16	1.57e-15
TAG56:6-FA22:4	-3.1592	1.17e-11	1.68e-11
TAG45:1-FA18:1	-3.15519	1.06e-15	2.18e-15
TAG50:0-FA18:0	-3.14822	2.9e-19	1.12e-18
TAG51:2-FA15:0	-3.14758	1.27e-19	5.43e-19
TAG51:1-FA15:0	-3.14672	3.81e-20	1.77e-19
PC(15:0/18:1)	-3.1445	1.2e-21	8.5e-21
PE(18:2/20:1)	-3.14367	8.37e-19	2.95e-18
PE(18:1/18:3)	-3.1425	0.022869	0.023891
TAG54:3-FA18:0	-3.14027	1.29e-18	4.27e-18
TAG50:2-FA14:0	-3.1394	8.58e-16	1.79e-15
TAG56:3-FA20:1	-3.13907	2.83e-18	9.02e-18
PC(16:0/12:0)	-3.13866	8.95e-14	1.46e-13
DAG(18:1/20:1)	-3.13312	0.005733	0.006117
TAG53:3-FA16:0	-3.13108	2.5e-19	9.9e-19
TAG51:2-FA18:1	-3.12807	1.85e-19	7.67e-19
TAG46:1-FA12:0	-3.12558	3.52e-15	6.7e-15
PC(18:1/18:4)	-3.12254	4.89e-07	5.85e-07
TAG52:1-FA16:1	-3.1186	1.83e-17	4.87e-17
PE(18:2/18:2)	-3.11678	1.02e-18	3.49e-18
PC(12:0/20:5)	-3.11661	1.19e-08	1.48e-08
TAG56:8-FA22:6	-3.09843	8.89e-12	1.28e-11
TAG52:4-FA20:3	-3.08879	9.03e-18	2.55e-17
TAG48:1-FA18:0	-3.08205	7.14e-15	1.29e-14
TAG52:5-FA18:3	-3.08018	3.54e-18	1.11e-17
TAG53:2-FA18:1	-3.06946	2.55e-19	1.01e-18
TAG52:1-FA18:1	-3.06896	2.3e-19	9.18e-19
TAG46:0-FA18:0	-3.0575	7.59e-07	9.04e-07
PE(16:0/17:0)	-3.05598	0.000124	0.000139
PC(17:0/18:1)	-3.05274	3.82e-21	2.29e-20
TAG52:6-FA16:1	-3.04583	8.67e-18	2.47e-17
PE(16:0/18:1)	-3.04164	1.34e-20	6.83e-20
TAG48:2-FA18:0	-3.0413	3.64e-15	6.85e-15
TAG54:3-FA18:3	-3.03726	8.39e-17	2.01e-16
TAG50:1-FA14:0	-3.03707	1.72e-15	3.39e-15
TAG52:3-FA16:0	-3.03537	1.25e-17	3.48e-17
TAG52:5-FA14:0	-3.03126	1.43e-15	2.85e-15
TAG58:8-FA18:1	-3.02303	1.28e-18	4.27e-18
PC(14:0/18:2)	-3.02205	8.09e-16	1.7e-15
TAG56:5-FA18:1	-3.01994	1.97e-18	6.42e-18
PC(12:0/18:2)	-3.01778	5.36e-15	9.95e-15
TAG53:1-FA18:1	-3.01301	2.74e-19	1.07e-18
TAG51:2-FA17:0	-3.01297	1.32e-18	4.38e-18
PE(17:0/18:1)	-3.00424	0.002608	0.002808
TAG49:1-FA18:1	-3.00235	2.01e-17	5.3e-17
TAG54:4-FA18:3	-3.00234	2.2e-18	7.12e-18
TAG52:5-FA20:3	-3.00079	2.38e-16	5.3e-16
TAG56:2-FA16:0	-2.99729	3.55e-15	6.72e-15
TAG48:2-FA12:0	-2.99356	7.67e-14	1.27e-13
TAG54:7-FA18:3	-2.9929	1.47e-16	3.36e-16
TAG52:1-FA20:0	-2.99242	4.18e-16	9.12e-16
PE(18:1/16:1)	-2.99183	3.79e-21	2.29e-20
PC(12:0/18:1)	-2.9917	3.62e-14	6.13e-14
LPE(17:0)	-2.99152	3.73e-11	5.19e-11
TAG52:3-FA18:0	-2.98738	1.45e-16	3.31e-16
TAG56:2-FA20:1	-2.98637	4.58e-18	1.39e-17
TAG54:6-FA20:3	-2.98528	8.21e-17	1.97e-16
TAG48:1-FA16:0	-2.98217	4.09e-16	8.95e-16
TAG50:0-FA14:0	-2.97969	1.35e-14	2.38e-14
DAG(16:0/16:1)	-2.9713	0.000101	0.000114
TAG52:2-FA20:0	-2.95569	6.95e-15	1.27e-14
TAG46:0-FA16:0	-2.9541	5.77e-16	1.24e-15
TAG50:3-FA16:1	-2.95366	1.02e-15	2.11e-15
DAG(16:1/18:0)	-2.9502	0.003736	0.004011
TAG48:4-FA18:1	-2.93804	9.83e-15	1.76e-14
TAG49:2-FA15:0	-2.93549	7.93e-18	2.27e-17
TAG52:5-FA18:1	-2.93334	3.55e-17	8.99e-17
PE(16:0/15:0)	-2.93016	2.37e-05	2.72e-05
TAG56:7-FA20:3	-2.9291	7.65e-17	1.85e-16
TAG45:0-FA16:0	-2.92389	1.27e-14	2.25e-14
TAG48:0-FA16:0	-2.91613	4.57e-17	1.13e-16
TAG52:4-FA16:0	-2.91324	2e-16	4.53e-16
TAG54:4-FA18:0	-2.91194	1.62e-17	4.34e-17
TAG51:1-FA18:1	-2.91174	2.16e-18	7.01e-18
PE(O-18:0/20:1)	-2.90991	6.41e-20	2.86e-19
PE(P-18:0/18:2)	-2.90593	1.36e-17	3.74e-17
TAG56:8-FA18:2	-2.90482	1.5e-17	4.11e-17
TAG50:5-FA14:0	-2.90274	8.12e-13	1.24e-12
TAG54:7-FA18:2	-2.89403	2.48e-17	6.38e-17
TAG58:7-FA20:4	-2.89166	1.68e-17	4.48e-17
TAG56:3-FA18:1	-2.89048	1.07e-16	2.52e-16
PC(18:2/16:1)	-2.88616	1.74e-15	3.43e-15
TAG50:1-FA18:0	-2.88475	7.11e-16	1.51e-15
TAG44:1-FA16:0	-2.88095	3.12e-10	4.18e-10
TAG52:7-FA18:1	-2.87965	7.43e-18	2.14e-17
TAG56:7-FA18:3	-2.87929	1.3e-17	3.59e-17
TAG51:1-FA18:0	-2.87893	5.67e-18	1.68e-17
PE(18:1/20:1)	-2.8707	1.57e-19	6.6e-19
TAG49:0-FA18:0	-2.86467	1.17e-16	2.73e-16
PE(P-16:0/18:2)	-2.86383	2.74e-14	4.68e-14
TAG52:6-FA14:0	-2.86376	2.37e-14	4.09e-14
TAG54:5-FA18:3	-2.85204	1.17e-16	2.73e-16
PC(16:0/16:1)	-2.84995	2.54e-17	6.48e-17
TAG47:0-FA16:0	-2.84744	1e-15	2.08e-15
TAG53:1-FA18:0	-2.84653	6.73e-18	1.97e-17
LPC(20:1)	-2.83054	5.27e-11	7.28e-11
PE(18:0/18:2)	-2.8282	2.65e-16	5.88e-16
TAG55:3-FA18:1	-2.82606	4.91e-17	1.21e-16
PC(18:1/20:1)	-2.82571	1.79e-13	2.83e-13
TAG46:2-FA12:0	-2.82523	1.05e-12	1.59e-12
TAG54:4-FA16:0	-2.82163	3.81e-17	9.57e-17
LPC(20:0)	-2.82088	0.00646	0.006871
PE(17:0/16:1)	-2.81653	1.9e-06	2.25e-06
TAG54:7-FA16:1	-2.81444	1.33e-15	2.66e-15
TAG56:8-FA20:5	-2.81442	1.64e-17	4.39e-17
TAG49:1-FA16:0	-2.81397	1.88e-17	4.97e-17
TAG54:4-FA20:3	-2.81376	2.48e-17	6.38e-17
TAG52:2-FA18:1	-2.8095	8.01e-17	1.93e-16
TAG52:7-FA20:5	-2.80729	7.1e-16	1.51e-15
TAG56:5-FA16:0	-2.80224	3.37e-09	4.32e-09
TAG55:5-FA18:1	-2.79759	5.93e-18	1.75e-17
TAG56:6-FA16:0	-2.7974	3.63e-11	5.06e-11
LPE(16:0)	-2.78864	1.86e-15	3.64e-15
PE(15:0/16:1)	-2.78591	0.000307	0.000342
TAG56:7-FA18:2	-2.78569	2.17e-17	5.67e-17
DAG(16:0/18:1)	-2.78098	0.030888	0.032088
LPC(18:1)	-2.77866	1.37e-13	2.2e-13
TAG56:5-FA20:3	-2.77434	1.2e-16	2.79e-16
TAG56:8-FA18:1	-2.77377	3.7e-17	9.33e-17
DAG(18:0/18:2)	-2.77115	0.035798	0.037013
TAG50:4-FA16:0	-2.76841	1.25e-13	2.02e-13
PC(17:0/20:4)	-2.76585	6.59e-13	1.01e-12
TAG50:5-FA20:5	-2.76226	1.3e-15	2.59e-15
TAG54:6-FA16:1	-2.76027	3.39e-15	6.47e-15
TAG57:2-FA18:1	-2.75678	2.54e-17	6.48e-17
PE(18:0/18:3)	-2.75163	0.027716	0.028912
TAG52:3-FA18:1	-2.7513	1.7e-15	3.38e-15
TAG56:2-FA20:0	-2.74947	1.82e-15	3.57e-15
PE(18:1/18:1)	-2.74563	6.31e-19	2.26e-18
TAG50:5-FA18:1	-2.74431	1.42e-14	2.52e-14
TAG52:5-FA20:5	-2.74383	9.33e-17	2.23e-16
TAG55:1-FA18:1	-2.74164	9.45e-17	2.25e-16
TAG58:2-FA18:1	-2.74047	8.99e-16	1.87e-15
TAG58:9-FA18:1	-2.72597	1.17e-16	2.73e-16
TAG54:3-FA20:1	-2.72352	4.34e-15	8.13e-15
TAG58:8-FA22:6	-2.71544	4.35e-12	6.37e-12
PC(18:1/18:1)	-2.70784	2.02e-17	5.3e-17
PE(O-18:0/18:1)	-2.70543	8.15e-19	2.89e-18
PE(18:2/20:5)	-2.70321	0.035659	0.036923
PE(16:0/20:1)	-2.69853	7.99e-16	1.69e-15
PC(15:0/20:4)	-2.69299	4.7e-12	6.87e-12
TAG58:6-FA18:0	-2.68554	8.42e-14	1.39e-13
TAG51:1-FA16:0	-2.68329	2.27e-16	5.11e-16
TAG55:2-FA18:1	-2.68037	1.54e-16	3.51e-16
PE(O-16:0/18:1)	-2.67907	9.29e-18	2.62e-17
TAG54:3-FA18:1	-2.67519	4.57e-15	8.53e-15
PC(15:0/18:3)	-2.66625	1.49e-13	2.36e-13
TAG54:2-FA18:1	-2.66207	1.89e-15	3.68e-15
TAG52:4-FA18:0	-2.65872	2.82e-14	4.8e-14
PE(P-18:0/20:1)	-2.65843	3.63e-18	1.13e-17
TAG56:4-FA20:3	-2.6496	2.29e-15	4.44e-15
PE(P-18:0/18:1)	-2.64806	1.6e-18	5.23e-18
TAG52:0-FA18:0	-2.64667	3.22e-16	7.08e-16
TAG54:7-FA18:1	-2.6455	4.52e-15	8.45e-15
TAG50:0-FA16:0	-2.64519	5.11e-16	1.11e-15
PC(18:0/18:3)	-2.64264	5.34e-15	9.92e-15
PC(18:1/16:1)	-2.6405	2.92e-16	6.46e-16
PC(18:0/18:2)	-2.6363	5.67e-15	1.05e-14
PE(O-16:0/20:5)	-2.63603	0.001349	0.001472
TAG54:1-FA20:0	-2.63537	1.05e-14	1.87e-14
TAG51:0-FA18:0	-2.62985	2.36e-16	5.29e-16
PE(O-16:0/16:0)	-2.62654	2.34e-16	5.25e-16
PE(18:0/14:0)	-2.62375	6.77e-10	8.9e-10
TAG49:0-FA16:0	-2.6221	1.04e-15	2.14e-15
PE(17:0/20:4)	-2.61726	2.78e-06	3.27e-06
TAG56:4-FA18:0	-2.61392	2.62e-15	5.05e-15
PE(16:0/16:0)	-2.61137	1.32e-13	2.13e-13
PC(17:0/20:3)	-2.60797	2.6e-12	3.84e-12
PE(P-18:1/18:0)	-2.60354	5.4e-17	1.32e-16
TAG56:2-FA18:0	-2.60284	3.52e-15	6.7e-15
PE(15:0/18:1)	-2.59316	0.000786	0.000865
PC(18:0/12:0)	-2.59305	5.82e-09	7.39e-09
TAG54:8-FA20:5	-2.59246	9.6e-15	1.72e-14
PE(14:0/20:4)	-2.58733	5.84e-07	6.97e-07
TAG48:1-FA12:0	-2.57821	3.08e-11	4.32e-11
TAG52:7-FA16:0	-2.57636	6.97e-15	1.27e-14
LPE(20:1)	-2.57354	2.23e-13	3.51e-13
TAG50:2-FA16:0	-2.56975	2.73e-14	4.68e-14
TAG51:2-FA16:0	-2.56966	1.02e-15	2.11e-15
TAG56:1-FA18:1	-2.56893	1.28e-15	2.57e-15
TAG56:7-FA16:0	-2.56197	5.18e-14	8.67e-14
TAG52:6-FA20:5	-2.5575	8.55e-15	1.54e-14
TAG54:5-FA20:5	-2.55633	1.16e-15	2.34e-15
TAG50:1-FA16:0	-2.55144	3.22e-15	6.17e-15
TAG51:0-FA16:0	-2.54914	5.71e-15	1.05e-14
TAG58:7-FA18:0	-2.54844	8.85e-14	1.46e-13
TAG56:9-FA20:5	-2.53122	2.65e-15	5.09e-15
PE(15:0/18:2)	-2.53051	0.000234	0.000261
TAG54:1-FA18:1	-2.52631	6.4e-15	1.17e-14
TAG53:0-FA16:0	-2.52392	1.7e-14	2.98e-14
PE(P-18:1/20:5)	-2.52321	0.010721	0.011302
TAG46:1-FA18:0	-2.51188	1.29e-08	1.59e-08
TAG52:4-FA20:4	-2.51052	3.6e-15	6.81e-15
TAG52:1-FA18:0	-2.50971	8.04e-15	1.45e-14
TAG54:1-FA16:0	-2.50668	1.28e-13	2.06e-13
LPC(18:0)	-2.49147	8.56e-12	1.23e-11
TAG54:2-FA16:0	-2.48923	5.34e-14	8.91e-14
TAG52:6-FA18:1	-2.48762	1.36e-13	2.18e-13
TAG54:8-FA18:3	-2.48634	4.01e-13	6.23e-13
TAG54:2-FA18:0	-2.48588	4.89e-14	8.19e-14
TAG53:4-FA16:0	-2.47515	9.89e-15	1.77e-14
TAG50:4-FA20:4	-2.47434	1.72e-12	2.56e-12
PE(15:0/20:5)	-2.46314	1.38e-10	1.86e-10
PE(15:0/20:4)	-2.46	1.35e-06	1.59e-06
TAG54:5-FA20:3	-2.4557	8.8e-14	1.45e-13
TAG56:7-FA18:1	-2.44742	2.73e-14	4.68e-14
TAG52:2-FA18:0	-2.44696	1.7e-13	2.69e-13
PE(O-18:0/16:0)	-2.43847	7.47e-17	1.81e-16
PE(14:0/20:3)	-2.43755	0.000112	0.000126
PC(14:0/18:1)	-2.43669	1.82e-14	3.18e-14
FFA(15:0)	-2.43471	4.98e-16	1.08e-15
PE(18:0/16:1)	-2.42924	1.31e-16	3.02e-16
CE(18:2)	-2.42547	3.6e-06	4.21e-06
LPE(16:1)	-2.42535	3.42e-10	4.56e-10
PE(P-16:0/18:1)	-2.41597	2.28e-15	4.44e-15
PE(O-18:0/18:0)	-2.41372	1.41e-16	3.24e-16
PE(18:1/18:4)	-2.40754	0.00013	0.000146
TAG56:9-FA18:3	-2.4022	2.43e-15	4.69e-15
TAG56:7-FA20:4	-2.40209	1.68e-14	2.95e-14
TAG54:6-FA18:1	-2.40007	1.42e-13	2.27e-13
PC(16:0/18:1)	-2.39593	1.03e-15	2.13e-15
TAG55:1-FA16:0	-2.39399	8.15e-14	1.35e-13
PE(P-18:0/16:0)	-2.38923	5.73e-12	8.35e-12
TAG56:6-FA18:1	-2.38754	3.72e-14	6.28e-14
TAG56:7-FA18:0	-2.38505	2.27e-14	3.94e-14
TAG52:6-FA16:0	-2.36488	2.18e-12	3.23e-12
TAG53:2-FA16:0	-2.35562	9.33e-14	1.52e-13
PE(P-18:0/16:1)	-2.35426	6.35e-15	1.17e-14
TAG56:8-FA18:3	-2.34877	1.48e-13	2.36e-13
TAG54:4-FA20:4	-2.33917	1.11e-13	1.8e-13
PE(18:0/18:4)	-2.33913	7.91e-05	8.99e-05
PC(18:0/16:1)	-2.32473	3.07e-13	4.78e-13
PC(18:1/20:5)	-2.32283	1.85e-15	3.62e-15
TAG56:7-FA20:5	-2.31682	8.91e-14	1.46e-13
TAG54:1-FA18:0	-2.31341	4.3e-13	6.66e-13
TAG52:2-FA16:0	-2.30134	1.27e-12	1.89e-12
PE(P-18:0/18:0)	-2.29877	3.8e-15	7.14e-15
PE(18:0/17:0)	-2.29275	0.006303	0.006715
PE(17:0/20:3)	-2.29053	1.22e-05	1.41e-05
FFA(17:0)	-2.28519	2.49e-13	3.91e-13
PC(15:0/20:3)	-2.28132	1.14e-10	1.55e-10
TAG56:8-FA16:0	-2.2811	4.31e-13	6.66e-13
TAG54:2-FA20:0	-2.26908	5.94e-12	8.64e-12
TAG52:5-FA16:0	-2.25777	1.41e-13	2.26e-13
TAG46:3-FA18:1	-2.25198	3.32e-11	4.65e-11
TAG53:1-FA16:0	-2.24978	6.17e-13	9.49e-13
PC(20:0/18:1)	-2.24923	0.031334	0.032492
TAG53:6-FA20:4	-2.24684	2.67e-13	4.17e-13
TAG54:6-FA20:5	-2.23715	3.07e-13	4.78e-13
TAG54:7-FA20:4	-2.23453	7.15e-12	1.04e-11
PC(16:0/18:0)	-2.23321	3.31e-12	4.87e-12
TAG52:1-FA16:0	-2.2253	2.75e-12	4.07e-12
SM(18:0)	-2.22124	8.7e-05	9.85e-05
PC(16:0/20:5)	-2.20486	1.26e-15	2.53e-15
SM(16:0)	-2.20439	1.64e-12	2.45e-12
PE(18:0/16:0)	-2.19866	1.55e-13	2.45e-13
TAG56:1-FA16:0	-2.18901	8.12e-11	1.11e-10
PC(18:2/20:5)	-2.17572	4.19e-14	7.04e-14
TAG54:0-FA16:0	-2.17394	1e-09	1.31e-09
SM(22:1)	-2.16995	7.97e-08	9.67e-08
PE(18:0/18:1)	-2.1567	3.85e-14	6.49e-14
PC(16:0/16:0)	-2.14474	9.81e-05	0.000111
TAG53:5-FA20:4	-2.14113	7.69e-13	1.17e-12
TAG54:7-FA20:5	-2.13997	3.67e-12	5.4e-12
PC(18:0/18:1)	-2.13735	2.29e-13	3.6e-13
LPE(18:1)	-2.13447	7.37e-09	9.23e-09
TAG54:5-FA16:0	-2.13114	8.07e-12	1.16e-11
TAG52:6-FA20:4	-2.1286	3.29e-11	4.61e-11
PE(P-16:0/20:3)	-2.11488	0.010104	0.010683
TAG56:6-FA20:5	-2.10041	2.56e-12	3.79e-12
TAG50:5-FA20:4	-2.09848	8.11e-10	1.06e-09
PC(14:0/20:5)	-2.09395	7.64e-12	1.11e-11
TAG55:5-FA20:4	-2.09026	2.12e-12	3.16e-12
LPE(18:2)	-2.06909	1.83e-05	2.11e-05
TAG54:5-FA18:0	-2.06698	3.87e-11	5.38e-11
LPE(18:0)	-2.06245	6.66e-10	8.78e-10
LPE(20:0)	-2.05416	2.74e-09	3.53e-09
TAG58:8-FA20:3	-2.04788	2.72e-11	3.84e-11
TAG53:4-FA20:4	-2.04765	1.3e-11	1.86e-11
LPE(15:0)	-2.03991	1.98e-06	2.34e-06
PE(18:0/20:1)	-2.03786	1.11e-12	1.67e-12
TAG52:0-FA16:0	-2.03783	1.26e-10	1.71e-10
TAG51:4-FA20:4	-2.03742	2.21e-11	3.14e-11
PC(18:1/20:3)	-2.03176	1.71e-10	2.29e-10
TAG52:5-FA20:4	-2.02722	6.48e-11	8.89e-11
PE(P-18:1/20:3)	-2.02638	0.000121	0.000136
PE(15:0/20:3)	-2.00565	0.000117	0.000131
FFA(24:1)	2.48174	1.51e-11	2.15e-11
