# Supplementary material for: The lipidomes of C. elegans with mutations in asm-3/acid sphingomyelinase and hyl-2/ceramide synthase show distinct lipid profiles during aging
Source: Aging (Albany NY). 2023 Feb 13;15(3):650–74. doi: 10.18632/aging.204515 (PMC9970312; doi:10.18632/aging.204515)
Supplement: Supplementary Table 9 [file aging-15-204515-s010.xlsx]

## Sheet: Supplemental Table 9
Supplemental Table 9. Comparative Lipid Changes Between 10- and 1-day hyl2 animals ve 10- and 1-day N2 animals
lipid	logFC	P.Value	FDR
DAG(18:1/18:2)	-5.7567	0.003299	0.004739
DAG(15:0/18:2)	-3.58973	0.005891	0.008145
DAG(18:1/20:2)	-3.55963	0.014034	0.018563
DAG(18:0/18:2)	-2.78988	0.034602	0.043314
DAG(16:1/18:2)	-2.64557	0.018842	0.024415
TAG50:2-FA18:1	2.00756	8.54e-10	2.92e-09
TAG52:5-FA20:3	2.01251	1.23e-09	4.05e-09
TAG58:8-FA20:3	2.0167	4.65e-11	2.11e-10
PE(18:0/16:0)	2.02166	4.11e-12	2.3e-11
TAG52:0-FA18:0	2.02488	1.95e-11	9.51e-11
TAG51:0-FA16:0	2.02931	4.48e-11	2.07e-10
TAG46:0-FA14:0	2.02994	2.82e-08	7.44e-08
LPE(15:0)	2.03535	2.08e-06	4.3e-06
TAG52:7-FA16:0	2.04021	6.27e-11	2.78e-10
TAG51:4-FA20:4	2.04402	1.97e-11	9.53e-11
TAG51:2-FA16:0	2.04405	1.18e-11	5.96e-11
TAG56:2-FA16:0	2.04519	4.29e-09	1.27e-08
TAG54:4-FA20:2	2.04709	2.1e-10	8.17e-10
TAG56:3-FA18:1	2.0499	1.19e-10	4.95e-10
TAG44:0-FA12:0	2.054	0.000953	0.001468
TAG56:3-FA20:0	2.05663	2.56e-10	9.65e-10
TAG56:1-FA16:0	2.05673	6.23e-10	2.22e-09
PE(P-18:0/16:0)	2.05812	9.1e-10	3.09e-09
TAG46:0-FA16:0	2.05817	6.82e-10	2.39e-09
PE(16:0/14:0)	2.05901	4.99e-07	1.13e-06
TAG52:4-FA20:3	2.06625	1.54e-10	6.29e-10
TAG52:4-FA16:0	2.06899	1.77e-10	7.14e-10
PC(16:0/20:3)	2.07448	1.97e-10	7.82e-10
TAG54:7-FA16:1	2.07608	1.96e-10	7.8e-10
FFA(20:0)	2.08131	1.04e-07	2.54e-07
PC(16:0/18:0)	2.08193	4.17e-11	1.95e-10
TAG54:8-FA20:4	2.08525	3.08e-10	1.15e-09
PC(12:0/20:3)	2.08716	1.56e-08	4.28e-08
FFA(14:0)	2.09271	9.92e-13	7.09e-12
TAG58:9-FA20:4	2.09327	2.46e-12	1.52e-11
TAG46:0-FA12:0	2.09726	0.004928	0.006936
PC(18:0/18:0)	2.10608	1.15e-12	7.99e-12
TAG51:0-FA18:0	2.10847	2.75e-12	1.67e-11
TAG49:1-FA14:0	2.11223	5.01e-10	1.81e-09
TAG58:8-FA20:4	2.11405	5.79e-12	3.2e-11
TAG56:3-FA18:0	2.11899	4.32e-11	2.01e-10
TAG54:1-FA18:1	2.12028	7.47e-12	4.01e-11
TAG49:0-FA16:0	2.12701	5.87e-12	3.22e-11
TAG47:2-FA14:0	2.13098	1.22e-09	4.03e-09
TAG48:3-FA18:2	2.13147	2.99e-09	9.13e-09
TAG48:2-FA18:0	2.13211	1.96e-09	6.17e-09
TAG50:3-FA18:0	2.14294	2.19e-09	6.84e-09
TAG45:1-FA16:0	2.14896	9.04e-11	3.86e-10
TAG48:0-FA14:0	2.15223	7.82e-10	2.72e-09
TAG46:3-FA14:0	2.16045	7.91e-05	0.000136
TAG45:1-FA18:1	2.16254	1.7e-09	5.42e-09
PC(12:0/20:1)	2.16775	0.022662	0.029042
TAG50:3-FA14:0	2.17035	2.63e-09	8.12e-09
TAG50:2-FA16:1	2.17087	1.06e-10	4.47e-10
PC(18:0/20:3)	2.17314	8.17e-11	3.58e-10
TAG54:7-FA20:5	2.17367	2.04e-12	1.29e-11
PC(18:0/16:1)	2.17449	4.08e-12	2.3e-11
PC(12:0/20:4)	2.17847	5.2e-09	1.52e-08
TAG56:5-FA20:3	2.18207	3.3e-12	2e-11
TAG54:4-FA18:0	2.18609	4e-12	2.28e-11
TAG54:4-FA16:1	2.18958	5.18e-10	1.86e-09
TAG54:3-FA16:0	2.19068	2.12e-11	1.01e-10
TAG54:7-FA20:4	2.19442	1.38e-11	6.92e-11
TAG54:0-FA16:0	2.20076	6.82e-10	2.39e-09
PC(14:0/16:1)	2.20438	0.000368	0.000589
TAG54:3-FA18:1	2.20579	1.08e-11	5.52e-11
TAG53:4-FA16:0	2.21201	1.01e-12	7.18e-12
TAG56:9-FA20:4	2.21348	1.19e-12	8.1e-12
TAG54:2-FA18:1	2.21359	3.82e-12	2.27e-11
TAG47:1-FA16:1	2.21691	2.2e-10	8.46e-10
TAG56:7-FA16:1	2.22904	7.09e-08	1.77e-07
TAG54:5-FA20:4	2.23114	4.2e-13	3.16e-12
TAG56:6-FA20:4	2.24305	2.98e-13	2.36e-12
TAG46:2-FA18:2	2.25255	2.71e-06	5.54e-06
TAG56:6-FA18:0	2.25982	3e-13	2.36e-12
PC(20:0/18:1)	2.26329	0.030323	0.03823
TAG50:4-FA16:0	2.26933	1.93e-10	7.73e-10
TAG46:3-FA18:2	2.27046	1.05e-09	3.52e-09
PC(16:0/20:4)	2.27194	5.53e-13	4.03e-12
TAG54:6-FA16:0	2.28052	3.59e-13	2.76e-12
TAG52:6-FA20:4	2.28571	2.45e-12	1.52e-11
PC(16:0/16:1)	2.28774	4.32e-13	3.22e-12
TAG47:1-FA16:0	2.30412	8.7e-12	4.55e-11
LPC(18:3)	2.33167	0.001779	0.002653
TAG47:0-FA16:0	2.33274	3.95e-12	2.27e-11
TAG52:3-FA18:1	2.3402	1.48e-12	9.79e-12
LPE(18:2)	2.34431	1.72e-06	3.61e-06
TAG50:4-FA14:0	2.36144	2.02e-10	7.97e-10
LPC(18:2)	2.36379	4.44e-08	1.13e-07
TAG54:7-FA22:6	2.36568	0.000292	0.000472
PE(16:0/16:0)	2.37567	5.31e-12	2.95e-11
TAG48:2-FA16:1	2.38329	5.29e-11	2.39e-10
PE(18:0/20:4)	2.38481	1.59e-12	1.03e-11
TAG56:4-FA20:3	2.39348	1.78e-13	1.57e-12
TAG58:6-FA18:0	2.394	7.49e-12	4.01e-11
TAG54:1-FA20:0	2.40119	4.99e-13	3.68e-12
TAG49:2-FA14:0	2.40684	3.9e-12	2.27e-11
TAG52:5-FA20:4	2.4074	9.91e-14	9.39e-13
TAG53:2-FA16:0	2.41518	3.28e-14	3.54e-13
PC(14:0/20:3)	2.41918	7.37e-12	4.01e-11
TAG52:6-FA16:1	2.43853	2e-13	1.69e-12
TAG49:0-FA18:0	2.43904	1.44e-13	1.33e-12
PC(18:0/20:4)	2.44091	5.6e-14	5.77e-13
TAG47:1-FA14:0	2.44551	1.02e-11	5.26e-11
TAG54:5-FA20:3	2.44741	1.01e-13	9.46e-13
TAG45:0-FA16:0	2.44964	1.41e-11	7e-11
TAG48:3-FA12:0	2.46615	3.84e-10	1.42e-09
TAG50:3-FA16:0	2.46693	2.55e-12	1.57e-11
TAG52:1-FA20:0	2.46712	1.51e-12	9.89e-12
CE(18:1)	2.47631	2.05e-10	8.02e-10
TAG48:2-FA16:0	2.49433	3.7e-12	2.22e-11
TAG52:5-FA16:0	2.50116	1.72e-15	2.95e-14
TAG56:5-FA20:4	2.50399	4.15e-15	5.82e-14
PE(14:0/20:4)	2.50524	1.18e-06	2.55e-06
TAG56:4-FA20:4	2.51486	5.42e-15	7.45e-14
PC(16:0/12:0)	2.51551	3.09e-10	1.15e-09
TAG50:1-FA16:0	2.52031	5.55e-15	7.48e-14
TAG52:6-FA14:0	2.52178	3.86e-12	2.27e-11
TAG48:4-FA14:0	2.52778	3.9e-10	1.43e-09
TAG52:6-FA16:0	2.53209	1.47e-13	1.34e-12
TAG47:0-FA14:0	2.53405	1.27e-12	8.56e-12
CE(20:5)	2.5449	2.28e-13	1.9e-12
TAG54:5-FA16:1	2.5552	2.97e-13	2.36e-12
TAG54:6-FA16:1	2.55558	9.26e-14	8.89e-13
TAG58:6-FA20:4	2.562	1.58e-15	2.77e-14
TAG44:0-FA14:0	2.5671	7.85e-11	3.46e-10
TAG54:4-FA16:0	2.56718	3.11e-15	4.64e-14
TAG50:3-FA16:1	2.57576	3.58e-13	2.76e-12
LPE(16:1)	2.57665	4.52e-11	2.07e-10
TAG52:1-FA18:0	2.58388	2.21e-15	3.6e-14
TAG52:4-FA18:0	2.59286	8.08e-14	7.86e-13
PC(14:0/20:4)	2.59609	1.48e-12	9.79e-12
TAG44:2-FA12:0	2.60175	0.000111	0.000188
TAG52:3-FA18:0	2.60942	6.02e-14	6.12e-13
TAG50:6-FA20:4	2.61074	1.22e-08	3.45e-08
TAG53:1-FA16:0	2.61775	9.82e-16	1.97e-14
PC(16:0/16:0)	2.6191	3.23e-06	6.53e-06
TAG56:2-FA18:0	2.62635	2.36e-15	3.76e-14
TAG54:5-FA16:0	2.63173	1.43e-15	2.63e-14
TAG56:7-FA22:5	2.63285	1.81e-12	1.15e-11
TAG52:3-FA14:0	2.64349	1.16e-12	7.99e-12
TAG58:7-FA22:5	2.64588	9.21e-11	3.91e-10
TAG56:6-FA16:0	2.65498	2.13e-10	8.24e-10
TAG56:5-FA18:0	2.67514	6.15e-16	1.31e-14
LPE(18:1)	2.68585	3.94e-12	2.27e-11
TAG54:3-FA16:1	2.69365	1.99e-14	2.29e-13
TAG44:2-FA16:1	2.69414	1.15e-11	5.86e-11
PE(18:0/14:0)	2.70338	2.6e-10	9.75e-10
TAG52:3-FA16:1	2.70411	6.22e-14	6.23e-13
TAG56:4-FA18:0	2.70771	5.27e-16	1.15e-14
TAG52:1-FA16:1	2.7084	1.25e-14	1.51e-13
TAG54:6-FA20:4	2.71646	1.5e-16	4.2e-15
TAG48:1-FA16:0	2.71862	2.52e-14	2.76e-13
TAG42:1-FA18:1	2.72121	1.6e-11	7.88e-11
TAG50:5-FA14:0	2.7263	8.69e-12	4.55e-11
CE(20:4)	2.74532	4.77e-06	9.52e-06
TAG54:5-FA18:0	2.74842	3.59e-16	8.11e-15
LPE(20:5)	2.77349	9.9e-06	1.86e-05
TAG52:2-FA16:1	2.77373	7.56e-15	9.64e-14
TAG50:4-FA20:3	2.78007	2.02e-07	4.78e-07
PC(18:0/12:0)	2.78518	6.88e-10	2.4e-09
TAG50:1-FA18:0	2.78992	3.23e-15	4.7e-14
LPE(20:1)	2.80221	6.12e-15	8.1e-14
TAG56:2-FA20:0	2.81109	6.62e-16	1.36e-14
LPE(20:2)	2.81289	1.84e-13	1.57e-12
FFA(18:0)	2.81479	1.51e-15	2.71e-14
TAG50:2-FA18:0	2.82164	7.44e-15	9.64e-14
TAG54:2-FA18:0	2.83578	1.35e-16	3.95e-15
TAG52:2-FA16:0	2.84651	1.34e-16	3.95e-15
TAG48:1-FA14:0	2.8495	4.54e-14	4.75e-13
TAG52:0-FA16:0	2.86681	1.29e-16	3.95e-15
TAG52:2-FA20:0	2.87213	2.41e-14	2.68e-13
TAG46:2-FA16:1	2.88933	1.61e-12	1.04e-11
TAG54:2-FA16:0	2.91905	3.98e-17	1.86e-15
TAG48:2-FA18:1	2.92131	6.59e-14	6.5e-13
TAG52:1-FA16:0	2.93273	1.67e-17	9.78e-16
TAG50:2-FA16:0	2.94058	6.04e-17	2.53e-15
TAG48:3-FA14:0	2.94156	1.64e-13	1.47e-12
TAG44:1-FA18:1	2.96001	8.53e-12	4.53e-11
TAG54:1-FA16:0	2.96016	7.85e-17	2.9e-15
TAG46:2-FA14:0	2.96046	2.93e-13	2.36e-12
TAG46:1-FA12:0	2.9613	3.66e-14	3.89e-13
TAG54:1-FA18:0	2.96818	5.88e-18	4.58e-16
LPC(20:1)	2.97638	8.88e-12	4.61e-11
TAG46:1-FA18:1	2.97703	2.44e-13	2.01e-12
TAG50:5-FA20:4	2.99158	1.02e-15	1.98e-14
TAG45:0-FA14:0	2.99635	6.19e-13	4.47e-12
TAG52:5-FA14:0	3.00504	2.12e-15	3.54e-14
TAG52:4-FA14:0	3.02966	3.29e-15	4.7e-14
TAG54:2-FA20:0	3.07614	1.15e-17	8.04e-16
LPC(20:2)	3.07858	1.99e-14	2.29e-13
TAG50:0-FA14:0	3.08647	2.86e-15	4.46e-14
TAG58:6-FA22:4	3.10854	2.32e-10	8.9e-10
TAG56:6-FA22:4	3.1087	2.08e-11	1e-10
TAG46:2-FA18:1	3.12195	2.99e-15	4.56e-14
LPE(20:0)	3.13518	2.77e-16	6.92e-15
TAG52:2-FA18:0	3.13981	1.82e-18	1.82e-16
TAG56:5-FA16:0	3.14957	8.37e-11	3.6e-10
LPC(16:1)	3.17559	2.59e-06	5.3e-06
TAG44:3-FA18:2	3.20246	1.54e-06	3.25e-06
TAG50:2-FA14:0	3.2079	3.16e-16	7.38e-15
TAG52:2-FA14:0	3.22818	2.24e-16	5.82e-15
TAG44:1-FA12:0	3.23341	1.81e-13	1.57e-12
TAG50:1-FA14:0	3.23867	8.65e-17	3.03e-15
TAG46:1-FA14:0	3.24045	1.16e-14	1.43e-13
TAG54:0-FA18:0	3.31141	9.25e-20	2.16e-17
LPE(20:3)	3.31565	1.95e-14	2.29e-13
TAG48:2-FA14:0	3.33198	6.14e-17	2.53e-15
LPC(20:5)	3.33803	4.16e-13	3.16e-12
LPC(18:1)	3.35261	3.01e-17	1.51e-15
LPE(20:4)	3.35869	1.73e-11	8.49e-11
TAG44:2-FA18:1	3.39913	1.09e-14	1.36e-13
TAG48:1-FA12:0	3.42168	2.88e-16	6.97e-15
TAG46:0-FA18:0	3.42423	5.09e-08	1.29e-07
TAG44:1-FA16:1	3.43089	1.84e-13	1.57e-12
TAG48:2-FA12:0	3.43935	1.61e-16	4.34e-15
LPE(16:0)	3.49238	2.58e-20	9.05e-18
TAG46:2-FA12:0	3.52469	7.08e-17	2.76e-15
TAG46:1-FA16:0	3.52665	1.15e-16	3.84e-15
TAG44:0-FA16:0	3.53245	8.44e-07	1.85e-06
LPC(18:0)	3.68862	2.11e-19	3.7e-17
LPC(20:3)	3.70153	4e-18	3.51e-16
LPE(18:0)	3.71932	5.09e-21	3.57e-18
TAG44:1-FA16:0	3.72114	2.11e-14	2.39e-13
LPC(20:4)	3.76188	1.32e-17	8.4e-16
TAG48:1-FA18:0	3.78856	3.48e-19	4.88e-17
LPC(16:0)	3.81945	4.95e-19	5.79e-17
TAG42:1-FA14:0	3.89131	6.56e-07	1.46e-06
TAG46:1-FA18:0	3.90519	1.42e-15	2.63e-14
TAG44:1-FA14:0	4.12564	2.54e-17	1.37e-15
TAG42:0-FA14:0	4.30618	3.85e-05	6.77e-05
LPC(20:0)	5.2137	1.81e-06	3.77e-06
